# Supplementary material
Source: PubMed Central journal article supplement (PMC3674780)

# Supporting Information

## Direct Palladium-Catalyzed Alkynylation of N-Fused Heterocycles

Ilya V. Seregin, Victoria Ryabova and Vladimir Gevorgyan\*

*Department of Chemistry, University of Illinois at Chicago  
845 West Taylor Street, Chicago, Illinois 60607-7061*

### General Information

NMR spectra were recorded on Bruker Avance DRX-500 (500 MHz) and DPX-400 (400 MHz), instruments. GC/MS analyses were performed on a Hewlett Packard Model 6890 GC interfaced to a Hewlett Packard Model 5973 mass selective detector (15 m × 0.25 mm capillary column, HP-5MS). Column chromatography was carried out employing Silicycle silica gel (43-60 μm). HRMS (EI) analysis was performed on a JEOL GCmate II instrument. All manipulations with transition metal catalysts were conducted under inert atmosphere using a combination of glovebox and standard Schlenk techniques. Anhydrous toluene, tetrahydrofuran, and dichloromethane, purchased from Aldrich, were additionally purified on PureSolv PS-400-4 by Innovative Technology, Inc. purification system. All other chemicals and solvents were purchased from Aldrich, Fisher, Acros Organics, TCI, and Alfa Aesar and used without additional purification.

### Preparation of Starting Materials

**Indolizine, pyrrolo[1,2-*a*]quinoline, pyrrolo[2,1-*a*]isoquinoline and 6-methyl-dipyrrolo[1,2-*a*:1',2'-*c*]pyrimidine**

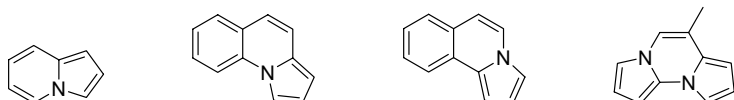

Compounds were prepared using copper-catalyzed cycloisomerization methodology developed by Gevorgyan *et al.*<sup>1</sup> NMR spectra matched those found in literature: indolizine,<sup>2</sup> pyrrolo[1,2-*a*]quinoline,<sup>3</sup> pyrrolo[2,1-*a*]isoquinoline<sup>4</sup> and 6-methyl- dipyrrolo[1,2-*a*:1',2'-*c*]pyrimidine.<sup>5</sup>

(1) Kel'in A. V.; Sromek A. W.; Gevorgyan V. *J. Am. Chem. Soc.* **2001**, *123*, 2074.

(2) Ohsawa, A.; Kawaguchi, T.; Igeta, H. *J. Org. Chem.* **1982**, *47*, 3497.

(3) Mamane V.; Hannen P.; Fürstner A. *Chem. Eur. J.* **2004**, *10*, 4556.

(4) Hosomi, A.; et al. *J. Heterocyclic Chem.* **1989**, *26*, 477 (and references therein).

(5) Kim, J. T.; Gevorgyan, V. *Org. Lett.* **2002**, *4*, 4697.

### 1-carboethoxy-2,6,7-triphenylpyrrolo[2,1-*b*]oxazole

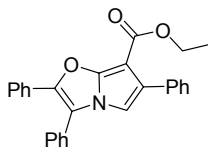

1-Carboethoxy-2,6,7-triphenylpyrrolo[2,1-*b*]oxazole was prepared *via* cyclopropene isomerization protocol developed by Gevorgyan *et al.*<sup>6</sup>

<sup>1</sup>H NMR (500.13 MHz, CDCl<sub>3</sub>) δ 7.59 - 7.69 (4 H, m), 7.48 - 7.59 (5 H, m), 7.32 - 7.43 (5 H, m), 7.27 - 7.33 (1 H, m), 6.65 (1 H, s), 4.33 (2 H, q, *J*=7.15 Hz), 1.35 (3 H, t, *J*=7.15 Hz); <sup>13</sup>C NMR (125.76 MHz, CDCl<sub>3</sub>) δ 163.31, 150.00, 145.27, 134.84, 130.84, 129.98 (+), 129.57 (+, 2C), 129.48 (+, 2C), 128.96 (+, 3C), 128.73 (+, 2C), 128.05, 127.70 (+, 2C), 126.95 (+), 126.59, 125.95 (+, 2C), 119.72, 101.72 (+), 59.45 (-), 14.55 (+).

### 1-carbomethoxyindolizine

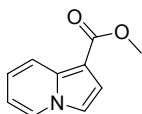

1-Carbomethoxyindolizine was prepared according to the procedure reported by Zhang *et al.*<sup>7</sup>

### Bromoalkynes and 1-iodo-2-phenylacetylene

All compounds were prepared from commercially available corresponding terminal alkynes *via* conventional procedures using *N*-bromosuccinamide (or *N*-iodosuccinamide), and AgNO<sub>3</sub> in acetone.<sup>8</sup>

### 1-Chloro-2-cyclohexenylacetylene

1-Chloro-2-cyclohexenylacetylene was prepared *via* published procedure,<sup>9</sup> NMR data matched those reported in literature.<sup>10</sup>

(6) Chuprakov, S.; Hwang, F.; Gevorgyan V. *Angew. Chem. Int. Ed.*, **2007**, *46*, ASAP.

(7) Zhang, L.; Liang, F.; Sun, L.; Hu, Y.; Hu, H. *Synthesis* **2000**, *12*, 1733.

(8) For exact procedures, see for example: Villeneuve, K.; Riddell, N.; Jordan, R. W.; Tsui, G. C.; Tam, W. *Org. Lett.* **2004**, *6*, 4543 (and references therein).

(9) Martins, M. A. P.; Emmerich, D. J.; Pereira, C. M. P.; Cunico, W.; Rossato, M.; Zanatta, N.; Bonaccorso, H. G. *Tetrahedron Lett.* **2004**, *45*, 4935.

(10) Murray, R. E.; *Synth. Comm.* **1980**, *10*, 345.

## General procedure for C-H alkylation of heterocycles

In a glovebox under nitrogen atmosphere, to a 5.0 mL Wheaton microreactor equipped with a spin vane and screw cap with a PTFE faced silicone septum under nitrogen atmosphere were added heterocyclic substrate, 3-5 mol% of  $\text{PdCl}_2(\text{PPh}_3)_2$  and 2 equiv. of KOAc. The microreactor was removed from the glovebox, bromoalkyne (1.3 - 1.8 equiv) and anhydrous toluene (0.001M-0.010M) were successively added and the mixture was stirred until completion (as monitored by TLC and/or GC/MS). The solvent was removed under reduced pressure and the residue was purified using flash-column chromatography using hexane or hexane/ethylacetate combination as eluent to afford pure alkynyl-heterocycles **3a-q**.

Compound-specific experimental details are summarized in **Table S1**.

### Notes on KIE experiment

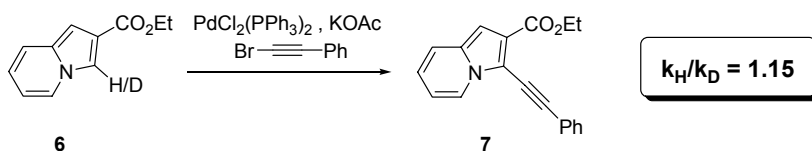

Reactions were run at  $70^\circ\text{C}$  in toluene and stopped at nearly 50% conversion. The product-starting material ratios were determined by NMR versus an internal standard ( $\text{CH}_2\text{Br}_2$ ). KIE value provided is an average of three experiments. Reference experiment with isotopically pure indolizine **6** indicated no observable deuterium scrambling at the reaction conditions.

**Table S1.** Direct C-H alkylation of N-fused heterocycles (experimental details).

| #  | Haloalkyne                                                                                               | Heterocyclic substrate                                                              | Product                                                                             | T°C, time, reaction scale                                   | Yield, % <sup>a</sup> |
|----|----------------------------------------------------------------------------------------------------------|-------------------------------------------------------------------------------------|-------------------------------------------------------------------------------------|-------------------------------------------------------------|-----------------------|
| 1  | Br—C≡C—Ph                                                                                                |    |    | <b>3a</b><br>60°C, 12 hrs<br>0.90 mmol                      | 51 (59)               |
| 2  | Br—C≡C—Si(Me) <sub>3</sub>                                                                               | -                                                                                   |    | <b>3b</b><br>60°C, 12 hrs<br>0.90 mmol                      | 62 (71)               |
| 3  | X—C≡C—Ph<br>X = Br, I                                                                                    |    |    | <b>3c</b><br>X=Br, 60°C, 8h<br>X=I, 80°C, 24h<br>0.14 mmol  | 76 (97)<br>Trace      |
| 4  | Br—C≡C— <i>n</i> Bu                                                                                      | -                                                                                   |    | <b>3d</b><br>60°C, 8 hrs<br>0.30 mmol                       | 64 (88)               |
| 5  | Br—C≡C—Si(Me) <sub>3</sub>                                                                               | -                                                                                   |    | <b>3e</b><br>60°C, 8 hrs<br>0.30 mmol                       | 90 (98)               |
| 6  | -                                                                                                        |    |    | <b>3f</b><br>60°C, 12 hrs<br>0.30 mmol                      | 87 (98)               |
| 7  | Br—C≡C—Ph                                                                                                | -                                                                                   |    | <b>3g</b><br>80°C, 8 hrs<br>0.47 mmol                       | 73 (83)               |
| 8  | Br—C≡C— <i>n</i> Bu                                                                                      | -                                                                                   |    | <b>3h</b><br>80°C, 8 hrs<br>0.30 mmol                       | 72 (89)               |
| 9  | Br—C≡C—                | -                                                                                   |   | <b>3i</b><br>80°C, 5 hrs<br>0.30 mmol                       | 65 (76)               |
| 10 | Br—C≡C—CO <sub>2</sub> Et                                                                                | -                                                                                   |  | <b>3j</b><br>30°C, 20 hrs<br>0.10 mmol                      | 64 (75)               |
| 11 | Br—C≡C—Ph                                                                                                |  |  | <b>3k</b><br>60°C, 12 hrs<br>0.12 mmol                      | 76 (97)               |
| 12 | -                                                                                                        |  |  | <b>3l</b><br>60°C, 12 hrs<br>0.30 mmol                      | 51 (64) <sup>b</sup>  |
| 13 | X—C≡C— <br>X = Br, Cl |  |  | <b>3m</b><br>X=Br, 80°C, 5h<br>X=Cl, 80°C, 24h<br>0.28 mmol | 71 (85)<br>Trace      |
| 14 | Br—C≡C—CO <sub>2</sub> Et                                                                                | -                                                                                   |  | <b>3n</b><br>40°C, 12 hrs<br>0.27 mmol                      | 63 (74)               |
| 15 | Br—C≡C—Si(Me) <sub>3</sub>                                                                               | -                                                                                   |  | <b>3o</b><br>60°C, 12 hrs<br>0.30 mmol                      | 59 (71)               |
| 16 | Br—C≡C—               | -                                                                                   |  | <b>3p</b><br>70°C, 12 hrs<br>0.30 mmol                      | 58 (67)               |
| 17 | Br—C≡C—               | -                                                                                   |  | <b>3q</b><br>75°C, 36 hrs<br>0.24 mmol                      | 50 (56) <sup>c</sup>  |

<sup>a</sup> Isolated yields, NMR yields are in brackets. <sup>b</sup> Bromoalkyne was used in the amount of 2.5 equiv. <sup>c</sup> Yield based on recovery of starting material. The reaction was stopped at 60% conversion to avoid thermal decomposition of the product.

**3-(phenylethynyl)indolizine, 3a**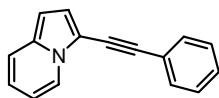

**3a** (0.90 mmol, 60°C, 51% isolated yield, 59% NMR yield):  $^1\text{H}$  NMR (500.13 MHz,  $\text{CDCl}_3$ )  $\delta$  8.44 (1 H, d,  $J=8.07$  Hz) 7.61 (2 H, d,  $J=6.97$  Hz) 7.52 (1 H, d,  $J=8.99$  Hz) 7.32 - 7.46 (3 H, m) 7.09 (1 H, d,  $J=4.22$  Hz) 6.89 (1 H, dd,  $J=9.44$ , 5.96 Hz) 6.79 (1 H, dd,  $J=8.50$ , 3.40 Hz) 6.50 (1 H, d,  $J=4.77$  Hz);  $^{13}\text{C}$  NMR (125.76 MHz,  $\text{CDCl}_3$ )  $\delta$  134.24, 131.00, 130.99, 128.42, 127.89, 124.67, 123.49, 119.15, 118.80, 111.31, 106.78, 99.94, 96.78, 80.56. HR EI MS  $m/z$  217.08915, Calcd for  $\text{C}_{16}\text{H}_{11}\text{N}$  217.089149.

**3-(trimethylsilyl(ethynyl))indolizine, 3b**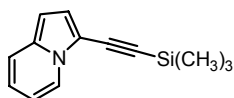

**3b** (0.90 mmol, 60°C, 62% isolated yield, 71% NMR yield):  $^1\text{H}$  NMR (500.13 MHz,  $\text{CDCl}_3$ )  $\delta$  8.27 (1 H, d,  $J=7.15$  Hz) 7.51 (1 H, d,  $J=8.99$  Hz) 7.03 (1 H, d,  $J=4.03$  Hz) 6.88 (1 H, dd  $J=6.59$ , 2.01) 6.78 (1 H, dd,  $J=7.99$ , 1.73) 6.44 (1 H, d,  $J=4.22$  Hz) 0.30 (9 H, s);  $^{13}\text{C}$  NMR (125.76 MHz,  $\text{CDCl}_3$ )  $\delta$  124.80, 121.86, 119.49, 119.07, 118.91, 111.27, 102.20, 100.33, 99.54, 95.89, 0.23. HR EI MS  $m/z$  213.09747, Calcd for  $\text{C}_{13}\text{H}_{15}\text{NSi}$  213.09738.

**1-carbomethoxy-3-(phenylethynyl)indolizine, 3c**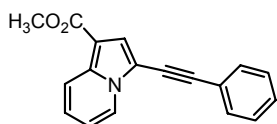

**3c** (0.14 mmol, 60°C, 76% isolated yield, 97% NMR yield):  $^1\text{H}$  NMR (500.13 MHz,  $\text{CDCl}_3$ )  $\delta$  8.38 (1 H, d,  $J=7.02$  Hz), 8.24 (1 H, d,  $J=9.06$  Hz), 7.58 (1 H, d,  $J=1.90$  Hz), 7.56 (1 H, d,  $J=2.92$  Hz), 7.52 (1 H, s), 7.34 - 7.43 (3 H, m), 7.18 (1 H, dd,  $J=8.48$ , 7.31 Hz), 6.89 (1 H, dd,  $J=6.80$ , 1.32 Hz), 3.91 (3 H, s);  $^{13}\text{C}$  NMR (125.76 MHz,  $\text{CDCl}_3$ )  $\delta$  164.74, 136.34, 131.27, 128.50, 125.38, 125.35, 123.86, 122.71, 121.14, 121.11, 119.82, 113.29, 108.23, 104.09, 97.01, 78.92, 51.08. HR EI MS  $m/z$  275.09463, Calcd for  $\text{C}_{18}\text{H}_{13}\text{NO}_2$  275.095298.

**1-carbomethoxy-3-(hexyn-1-yl)indolizine, 3d**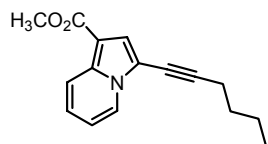

**3d** (0.30 mmol, 60°C, 64% isolated yield, 88% NMR yield):  $^1\text{H}$  NMR (500.13 MHz,  $\text{CDCl}_3$ )  $\delta$  8.26 (1 H, d,  $J=6.87$  Hz), 8.18 (1H, d, 9.06 Hz), 7.34 (1H, s), 7.11 (1 H, dd,  $J=8.33$ , 7.31 Hz), 6.82 (1 H, dd,  $J=6.80$ , 5.51 Hz), 3.88 (3 H, s), 2.55 (2 H, t,  $J=7.02$  Hz), 1.64 (2 H, d,  $J=7.31$  Hz), 1.65 (2 H, m), 1.53 (2 H, m), 0.97 (3 H, t,  $J=7.31$  Hz);  $^{13}\text{C}$  NMR (125.76 MHz,  $\text{CDCl}_3$ )  $\delta$  164.87, 135.70, 125.12, 123.26, 119.98, 119.64, 112.88, 103.28, 98.10, 70.09, 50.97, 30.84, 22.08, 19.50, 13.65. HR EI MS  $m/z$  255.12509, Calcd for  $\text{C}_{16}\text{H}_{17}\text{NO}_2$  255.12593.

**1-carbomethoxy-3-(trimethylsilyl(ethynyl))indolizine, 3e**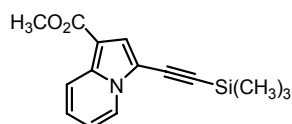

**3e** (0.30 mmol, 60°C, 90% isolated yield, 98% NMR yield):  $^1\text{H}$  NMR (500.13 MHz,  $\text{CDCl}_3$ )  $\delta$  8.26 (1 H, d,  $J=6.79$  Hz), 8.20 (1 H, d,  $J=8.99$  Hz), 7.45 (1 H, s), 7.15 (1 H, dd,  $J=8.99$ , 6.79 Hz), 6.86 (1 H, dd,  $J=6.79$ , 1.28 Hz), 3.88 (3 H, s), 0.30 (9 H, s);  $^{13}\text{C}$  NMR (125.76 MHz,  $\text{CDCl}_3$ )  $\delta$  164.67, 136.17, 125.45, 123.91, 121.49, 119.73, 113.26, 108.33, 103.69, 103.08, 94.13, 51.03, 0.01. HR EI MS  $m/z$  271.10294, Calcd for  $\text{C}_{15}\text{H}_{17}\text{NO}_2\text{Si}$  271.10286.

**3-((trimethylsilyl)ethynyl)pyrrolo[2,1-*a*]isoquinoline, 3f**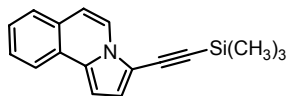

**3f** (0.30 mmol, 60°C, 87% isolated yield, 98% NMR yield):  $^1\text{H}$  NMR (500.13 MHz,  $\text{CDCl}_3$ )  $\delta$  8.03 (2 H, d,  $J=7.70$  Hz), 7.60 (1 H, d,  $J=7.70$  Hz), 7.49 (1 H, dd,  $J=7.32, 5.98$  Hz), 7.40 (1 H, dd,  $J=8.01, 1.49$ ), 7.00 (1 H, d,  $J=4.03$  Hz), 6.90 (1 H, d,  $J=0.55$  Hz), 6.87 (1 H, d,  $J=0.87$ ), 0.33 (9 H, s);  $^{13}\text{C}$  NMR (125.76 MHz,  $\text{CDCl}_3$ )  $\delta$  131.16, 127.58, 127.35, 126.96, 126.30, 125.86, 123.20, 122.49, 118.20, 111.57, 109.49, 101.54, 100.10, 95.67, 0.17. HR EI MS  $m/z$  263.11230, Calcd for  $\text{C}_{17}\text{H}_{17}\text{NSi}$  263.11303.

**3-(phenylethynyl)pyrrolo[2,1-*a*]isoquinoline, 3g**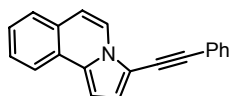

**3g** (0.47 mmol, 80°C, 73% isolated yield, 83% NMR yield):  $^1\text{H}$  NMR (500.13 MHz,  $\text{CDCl}_3$ )  $\delta$  8.15 (1 H, d,  $J=7.52$  Hz), 8.07 (1 H, d,  $J=8.07$  Hz), 7.58-7.63 (3 H, m), 7.32 - 7.45 (5 H, m), 7.06 (1 H, d,  $J=4.03$  Hz), 6.97 (1 H, dd,  $J=4.03, 0.73$  Hz), 6.91 (1 H, d,  $J=7.34$  Hz);  $^{13}\text{C}$  NMR (125.76 MHz,  $\text{CDCl}_3$ )  $\delta$  132.48, 131.97, 131.26, 131.09, 128.41, 128.05, 127.59, 127.29, 126.95, 126.25, 125.90, 123.11, 122.40, 117.77, 111.57, 100.46, 95.96, 80.37. HR EI MS  $m/z$  267.10415, Calcd for  $\text{C}_{20}\text{H}_{13}\text{N}$  267.10480.

**3-(hexyn-1-yl)pyrrolo[2,1-*a*]isoquinoline, 3h**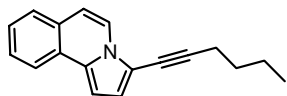

**3h** (0.30 mmol, 80°C, 72% isolated yield, 89% NMR yield):  $^1\text{H}$  NMR (500.13 MHz,  $\text{CDCl}_3$ )  $\delta$  8.03 (2 H, d,  $J=7.34$  Hz), 7.58 (1 H, d,  $J=7.70$  Hz), 7.47 (1 H, dd, ), 7.37 (1 H, dd,  $J=5.11, 1.32$  Hz), 6.89 (2 H, d,  $J=6.81$  Hz), 6.83 (1 H, d,  $J=7.34$  Hz), 2.58 (2 H, t,  $J=7.15$  Hz), 1.63 - 1.74 (2 H, m), 1.48 - 1.61 (2 H, m), 1.00 (3 H, t,  $J=7.34$  Hz);  $^{13}\text{C}$  NMR (125.76 MHz,  $\text{CDCl}_3$ )  $\delta$  130.25, 127.44, 127.13, 126.87, 126.04, 125.90, 123.09, 122.25, 116.52, 111.14, 110.09, 99.73, 96.72, 71.29, 31.02, 22.12, 19.58, 13.68. HR EI MS  $m/z$  247.13528, Calcd for  $\text{C}_{18}\text{H}_{17}\text{N}$  247.13610.

**3-((cyclohex-1-enyl)ethynyl) pyrrolo[2,1-*a*]isoquinoline, 3i**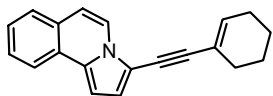

**3i** (0.30 mmol, 80°C, 65% isolated yield, 76% NMR yield):  $^1\text{H}$  NMR (500.13 MHz,  $\text{CDCl}_3$ )  $\delta$  8.03 (2 H, d,  $J=7.31$  Hz), 7.59 (1 H, d,  $J=7.60$  Hz), 7.48 (1 H, dd,  $J = 6.53, 2.04$ ), 7.38 (1 H, dd,  $J=7.90, 1.79$  Hz), 6.93 (2 H, d,  $J=4.09$  Hz), 6.84 (1 H, d,  $J=7.31$  Hz), 6.22 - 6.32 (1 H, m), 2.27 - 2.36 (2 H, m), 2.13 - 2.25 (2 H, m), 1.70 - 1.79 (2 H, m), 1.57 - 1.70 (2 H, m);  $^{13}\text{C}$  NMR (125.76 MHz,  $\text{CDCl}_3$ )  $\delta$  136.51, 134.64, 127.51, 127.24, 126.91, 126.07, 123.15, 122.33, 122.12, 120.66, 117.11, 111.31, 110.32, 100.22, 97.66, 77.51, 29.35, 25.85, 22.40, 21.58. HR EI MS  $m/z$  271.13634, Calcd for  $\text{C}_{20}\text{H}_{17}\text{N}$  271.13610.

**3-(ethylpropynoyl)pyrrolo[2,1-*a*]isoquinoline, 3j**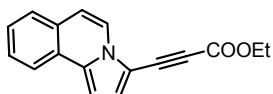

**3j** (0.10 mmol, 30°C, 64% isolated yield, 75% NMR yield):  $^1\text{H}$  NMR (500.13 MHz,  $\text{CDCl}_3$ )  $\delta$  8.16 (1 H, d,  $J=7.34$  Hz), 8.07 (1 H, d,  $J=7.89$  Hz), 7.65 (1 H, d,  $J=7.89$  Hz), 7.55 (1 H, dd,  $J=5.57, 0.97$ ), 7.47 (1 H, d,  $J=6.87$ ), 7.25 (1 H, d,  $J=4.22$  Hz), 6.99 (1 H, d,  $J=7.34$  Hz), 6.96 (1 H, dd,  $J=4.31, 0.64$  Hz), 4.34 (2 H, q,  $J=7.09$  Hz), 1.39 (3 H, t,  $J=7.15$  Hz);  $^{13}\text{C}$  NMR (125.76 MHz,  $\text{CDCl}_3$ )  $\delta$  154.51, 133.80, 127.98, 127.92, 127.32, 127.15, 125.40, 123.23, 122.93, 122.60, 112.69, 106.33, 101.60, 90.48, 79.63, 61.84, 14.25. HR EI MS  $m/z$  263.09441, Calcd for  $\text{C}_{17}\text{H}_{13}\text{NO}_2$  263.09463.

**7-carboethoxy-5-phenylethynyl-2,3,6-triphenyl-pyrrolo[2,1-*b*][1,3]oxazole, 3k**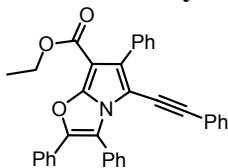

**3k** (0.12 mmol, 60°C, 76% isolated yield, 97% NMR yield):  $^1\text{H}$  NMR (500.13 MHz,  $\text{CDCl}_3$ )  $\delta$  7.64 - 7.75 (4 H, m), 7.59 (1 H, d,  $J=7.52$  Hz), 7.50 - 7.56 (4 H, m), 7.42 (2 H, d,  $J=6.47$ ), 7.29 - 7.38 (4 H, m), 7.14 - 7.21 (3 H, m), 6.77 - 6.85 (2 H, m), 4.33 (2 H, q,  $J=7.15$  Hz), 1.35 (3 H, t,  $J=7.06$  Hz);  $^{13}\text{C}$  NMR (125.76 MHz,  $\text{CDCl}_3$ )  $\delta$  162.67, 149.48, 146.06, 135.41, 133.23, 131.23, 130.66, 130.47, 130.21, 128.97, 128.87, 128.69, 127.94, 127.75, 127.50, 127.42, 127.29, 125.57, 125.50, 123.03, 121.09, 95.61, 80.00, 59.68, 14.48.



**6-methyl-3,9-bis(phenylethynyl)dipyrrolo[1,2-*a*:1',2'-*c*]pyrimidine, 3l**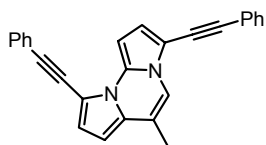

**3l** (0.30 mmol, 60°C, 51% isolated yield, 64% NMR yield):  $^1\text{H}$  NMR (500.13 MHz,  $\text{CDCl}_3$ )  $\delta$  7.53 - 7.63 (2 H, m) 7.45 - 7.52 (3 H, m) 7.32 - 7.44 (4 H, m) 7.27 (1 H, s) 7.23 (1 H, d,  $J=4.22$  Hz) 6.87 - 6.90 (2 H, m) 6.36 (1 H, d,  $J=1.10$  Hz) 6.25 (1 H, d,  $J=4.03$  Hz) 2.97 (3 H, s);  $^{13}\text{C}$  NMR (125.76 MHz,  $\text{CDCl}_3$ )  $\delta$  131.33, 131.06, 130.89, 130.49, 130.40, 128.56, 128.50, 128.47, 128.44, 128.34, 128.15, 127.88, 119.80, 119.40, 103.40, 102.06, 92.68, 92.25, 83.78, 82.71, 20.65. HR EI MS  $m/z$  370.145974, Calcd for  $\text{C}_{27}\text{H}_{18}\text{N}_2$  370.14700.

**1-((cyclohex-1-enyl)ethynyl)pyrrolo[1,2-*a*]quinoline, 3m**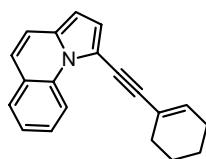

**3m** (0.28 mmol, 80°C, 71% isolated yield, 85% NMR yield):  $^1\text{H}$  NMR (500.13 MHz,  $\text{CDCl}_3$ )  $\delta$  9.53 (1 H, d,  $J=8.48$  Hz), 7.63 (1 H, d,  $J=7.89$  Hz), 7.48 (1 H, dd,  $J=6.51, 4.22$  Hz), 7.34 (1 H, dd,  $J=7.14, 1.70$  Hz), 7.27 (1 H, d,  $J=9.06$  Hz), 7.03 (1 H, d,  $J=9.06$  Hz), 7.00 (1 H, d,  $J=4.09$  Hz), 6.49 (1 H, d,  $J=3.80$  Hz), 6.24 - 6.34 (1 H, m), 2.31 - 2.41 (2 H, m), 2.18 - 2.26 (2 H, m), 1.71 - 1.82 (2 H, m), 1.61 - 1.71 (2 H, m);  $^{13}\text{C}$  NMR (125.76 MHz,  $\text{CDCl}_3$ )  $\delta$  135.71, 134.74, 134.11, 132.73, 128.26, 126.88, 125.00, 123.88, 121.72, 121.00, 120.44, 118.74, 116.29, 103.40, 97.32, 82.12, 28.78, 25.85, 22.38, 21.61. HR EI MS  $m/z$  271.13713, Calcd for  $\text{C}_{20}\text{H}_{17}\text{N}$  271.13610.

**1-(ethylpropynoyl)pyrrolo[1,2-*a*]quinoline, 3n**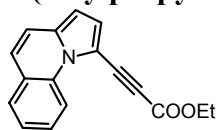

**3n** (0.27 mmol, 40°C, 63% isolated yield, 74% NMR yield):  $^1\text{H}$  NMR (500.13 MHz,  $\text{CDCl}_3$ )  $\delta$  9.37 (1 H, d,  $J=8.48$  Hz), 7.70 (1 H, d,  $J=7.75$  Hz), 7.61 (1 H, dd,  $J=8.01, 1.22$  Hz), 7.42 (1 H, dd,  $J=7.17, 3.90$  Hz), 7.32 (2 H, d,  $J=8.48$  Hz), 7.22 (1 H, d,  $J=9.35$  Hz), 6.53 (1 H, d,  $J=4.38$  Hz), 4.36 (2 H, q,  $J=7.02$  Hz), 1.41 (3 H, t,  $J=7.16$  Hz);  $^{13}\text{C}$  NMR (125.76 MHz,  $\text{CDCl}_3$ )  $\delta$  154.69, 135.51, 135.37, 128.82, 128.33, 126.59, 124.74, 124.72, 123.28, 118.30, 116.36, 109.57, 104.61, 89.69, 83.54, 61.78, 14.28. HR EI MS  $m/z$  263.0939, Calcd for  $\text{C}_{17}\text{H}_{13}\text{NO}_2$  263.09463.

**1-((trimethylsilyl)ethynyl)pyrrolo[1,2-*a*]quinoline, 3o**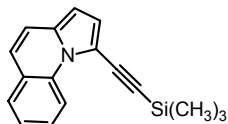

**3o** (0.30 mmol, 60°C, 59% isolated yield, 71% NMR yield): <sup>1</sup>H NMR (500.13 MHz, CDCl<sub>3</sub>) δ 9.63 (1 H, d, *J*=8.80 Hz), 7.64 (1 H, d, *J*=7.79 Hz), 7.47 (1 H, dd *J*=8.01, 1.55 Hz), 7.36 (1 H, dd, *J*=7.39, 2.99 Hz), 7.28 (1 H, d, *J*=9.17 Hz), 7.08 (1 H, d, *J*=4.22 Hz), 7.06 (1 H, d, *J*=9.17 Hz), 6.47 (1 H, d, *J*=4.03 Hz), 0.37 (9 H, s); <sup>13</sup>C NMR (125.76 MHz, CDCl<sub>3</sub>) δ 135.73, 132.96, 128.34, 126.75, 124.92, 124.02, 122.24, 121.04, 118.64, 116.47, 116.42, 110.14, 103.23, 101.57, 100.30, -0.16. HR EI MS *m/z* 263.11228, Calcd for C<sub>17</sub>H<sub>17</sub>NSi 263.11303.

**1-((2-naphthyl)ethynyl)pyrrolo[1,2-*a*]quinoline, 3p**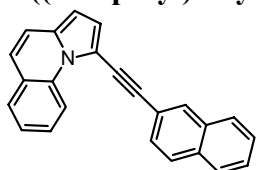

**3p** (0.30 mmol, 80°C, 58% isolated yield, 67% NMR yield): <sup>1</sup>H NMR (500.13 MHz, CDCl<sub>3</sub>) δ 9.68 (1 H, d, *J*=8.62 Hz) 8.12 (1 H, s) 7.77 - 7.94 (3 H, m) 7.68 (2 H, d, *J*=8.25 Hz) 7.48 - 7.61 (3 H, m) 7.40 (1 H, dd, *J*=7.52, 1.05 Hz) 7.33 (1 H, d, *J*=9.35 Hz) 7.19 (1 H, d, *J*=4.03 Hz) 7.10 (1 H, d, *J*=9.17 Hz) 6.57 (1 H, d, *J*=4.03 Hz); <sup>13</sup>C NMR (125.76 MHz, CDCl<sub>3</sub>) δ 135.70, 133.28, 133.20, 132.73, 130.33, 128.46, 128.21, 127.86, 127.78, 127.67, 127.22, 126.69, 126.62, 125.07, 124.11, 121.91, 120.99, 120.96, 118.74, 116.32, 110.12, 103.76, 96.12, 85.30. HR EI MS *m/z* 317.120961, Calcd for C<sub>24</sub>H<sub>15</sub>N 317.12045.

**1-((4-carboethoxyphenyl)ethynyl)pyrrolo[1,2-*a*]quinoline, 3q**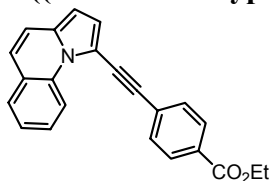

**3q** (0.24 mmol, 80°C, 50% isolated yield, 56% NMR yield): <sup>1</sup>H NMR (500.13 MHz, CDCl<sub>3</sub>) δ 9.55 (1 H, d, *J*=8.44 Hz) 8.08 (2 H, d, *J*=8.62 Hz) 7.68 (1 H, d, *J*=7.70 Hz) 7.64 (2 H, d, *J*=8.80 Hz) 7.56 (1 H, dd, *J*=6.74, 0.89 Hz) 7.39 (1 H, dd, *J*=7.98, 1.05 Hz) 7.32 (1 H, d, *J*=9.17 Hz) 7.16 (1 H, d, *J*=4.03 Hz) 7.12 (1 H, d, *J*=9.17 Hz) 6.55 (1 H, d, *J*=4.22 Hz) 4.41 (2 H, q, *J*=7.15 Hz) 1.43 (3 H, t, *J*=7.15 Hz); <sup>13</sup>C NMR (125.76 MHz, CDCl<sub>3</sub>) δ 166.09, 135.57, 133.68, 130.23, 129.67, 129.39, 128.56, 128.25, 127.31, 125.03, 124.23, 122.54, 121.36, 118.67, 116.18, 109.53, 103.98, 95.37, 88.13, 61.13, 14.36. HR EI MS *m/z* 339.125021, Calcd for C<sub>23</sub>H<sub>17</sub>NO<sub>2</sub> 339.12593.

<sup>1</sup>H spectrum of **3b**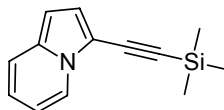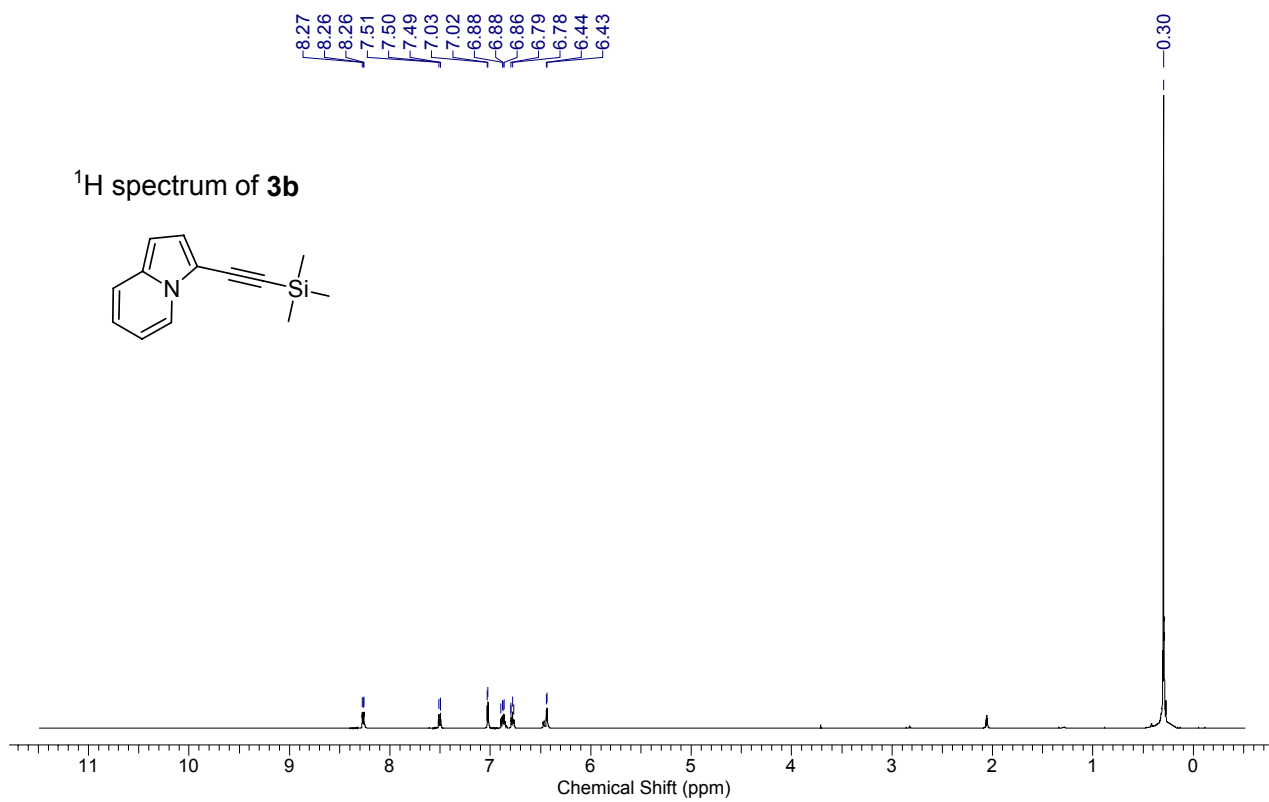<sup>13</sup>C spectrum of **3b**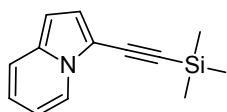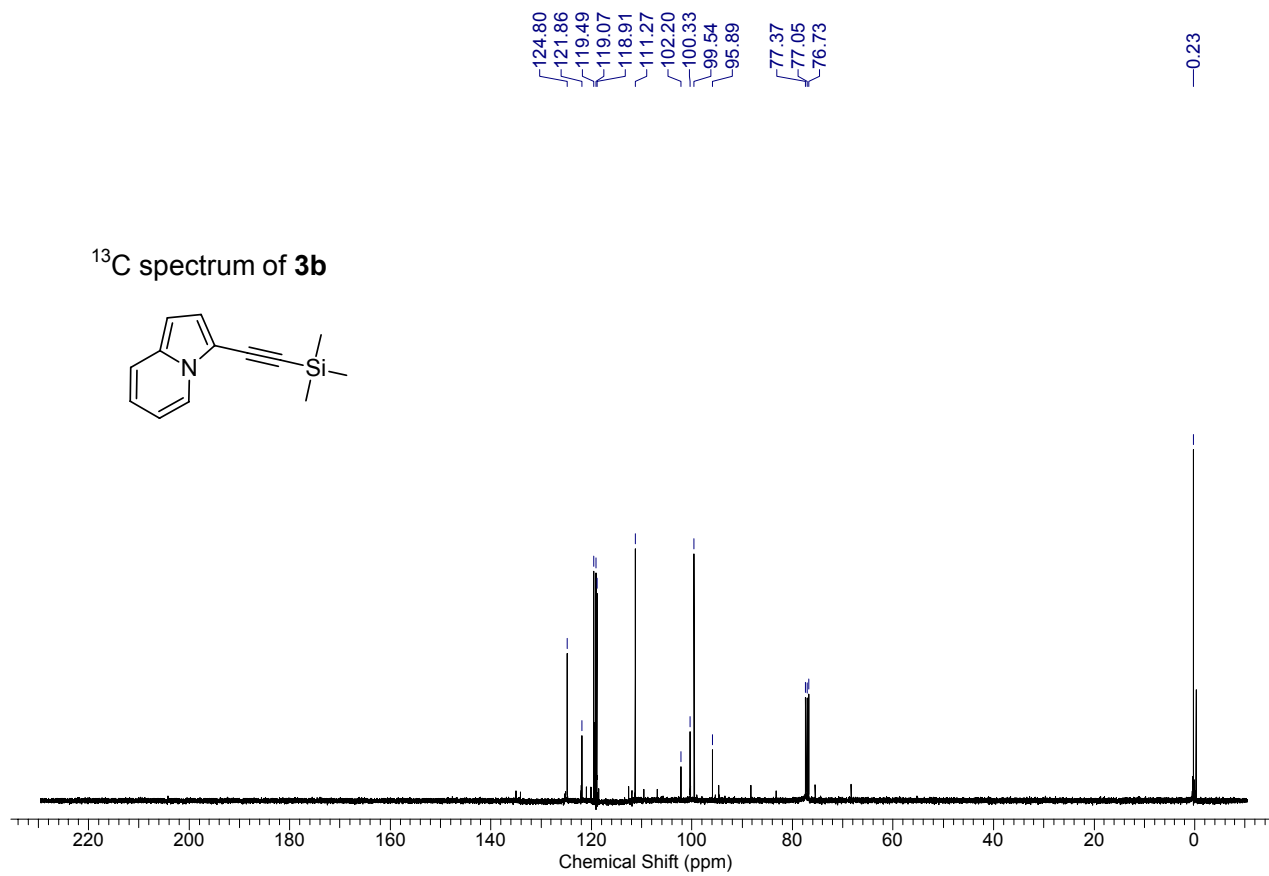

<sup>1</sup>H spectrum of **3c**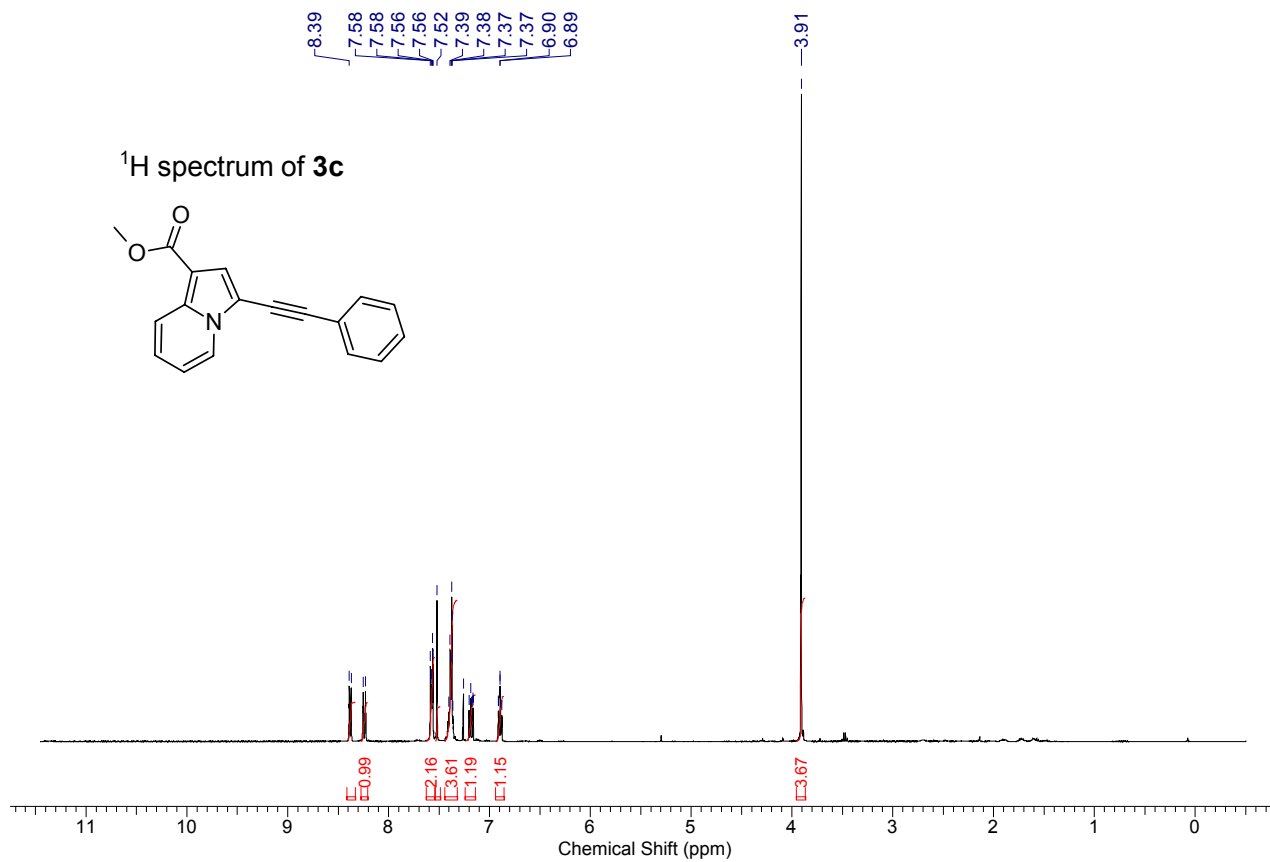<sup>13</sup>C spectrum of **3c**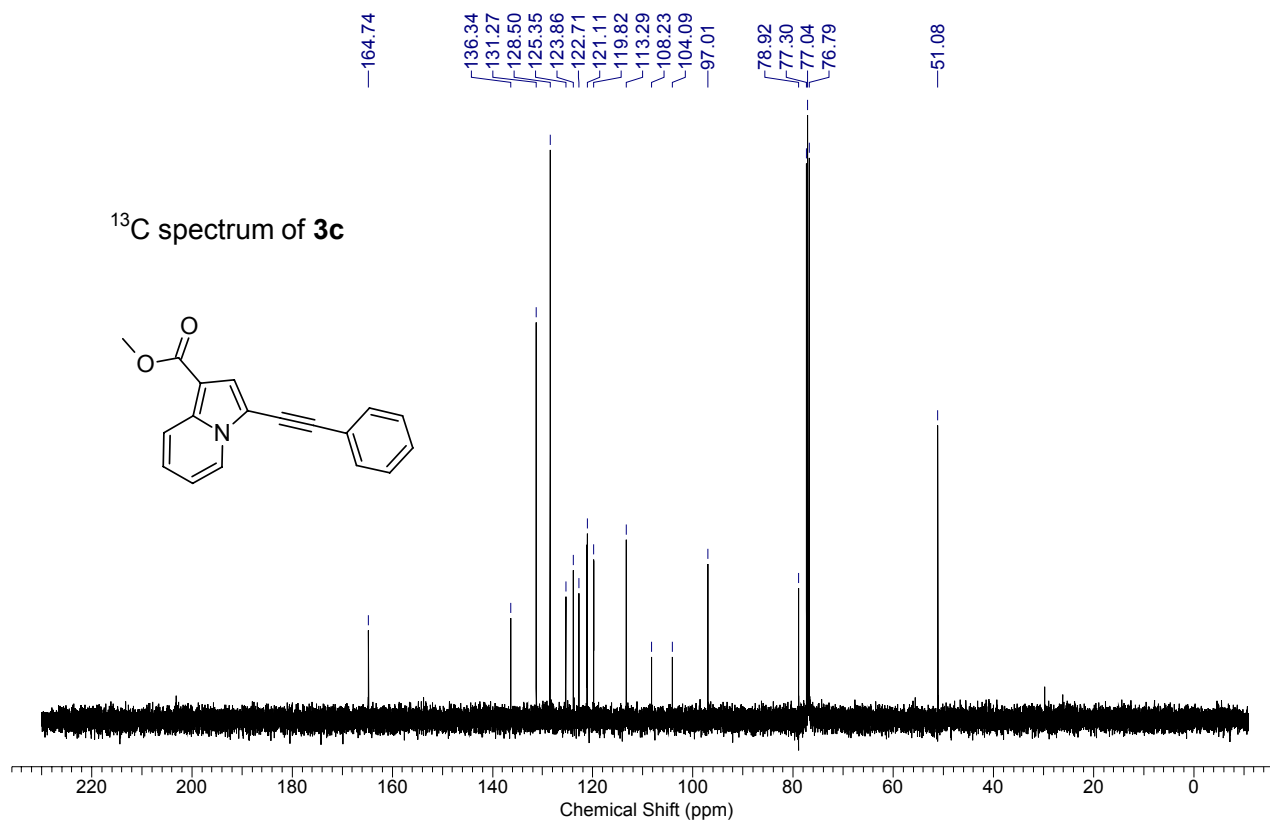

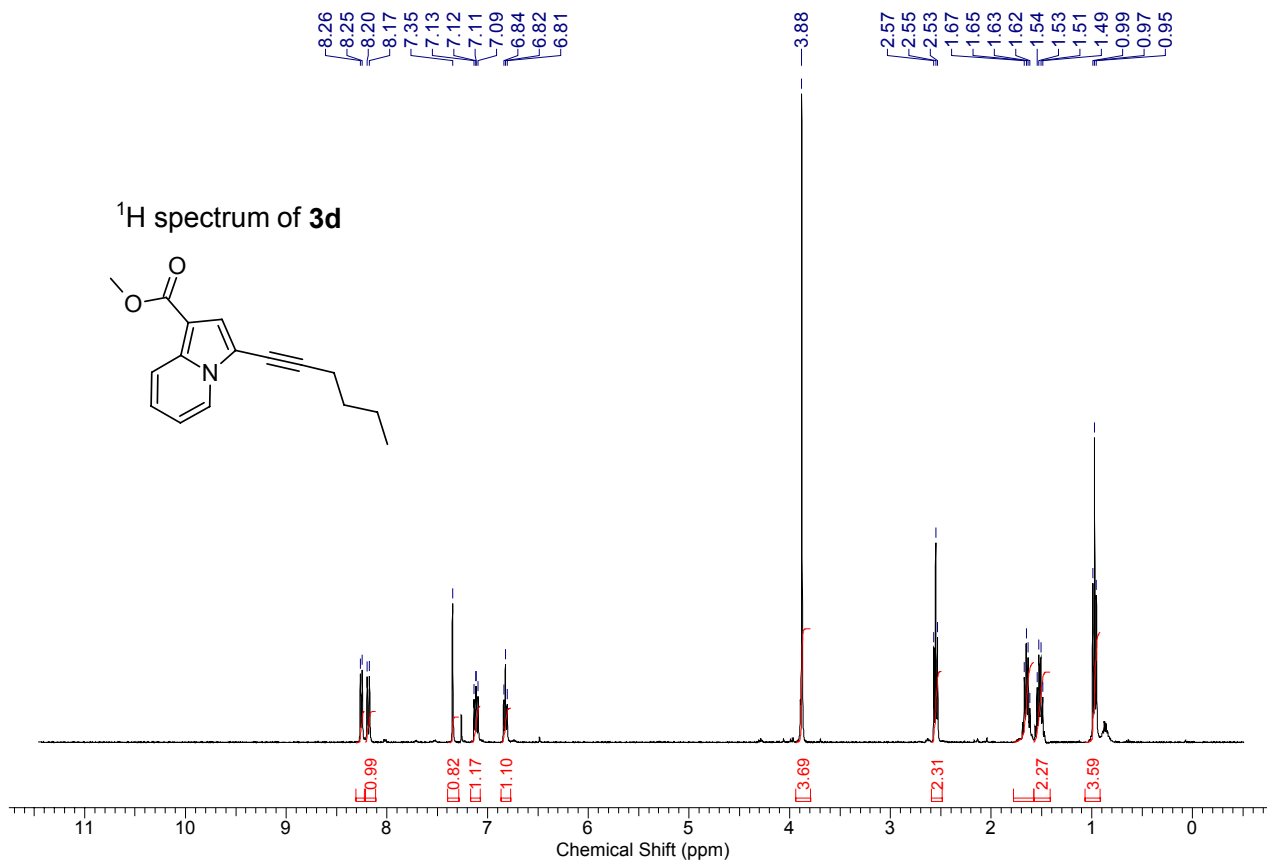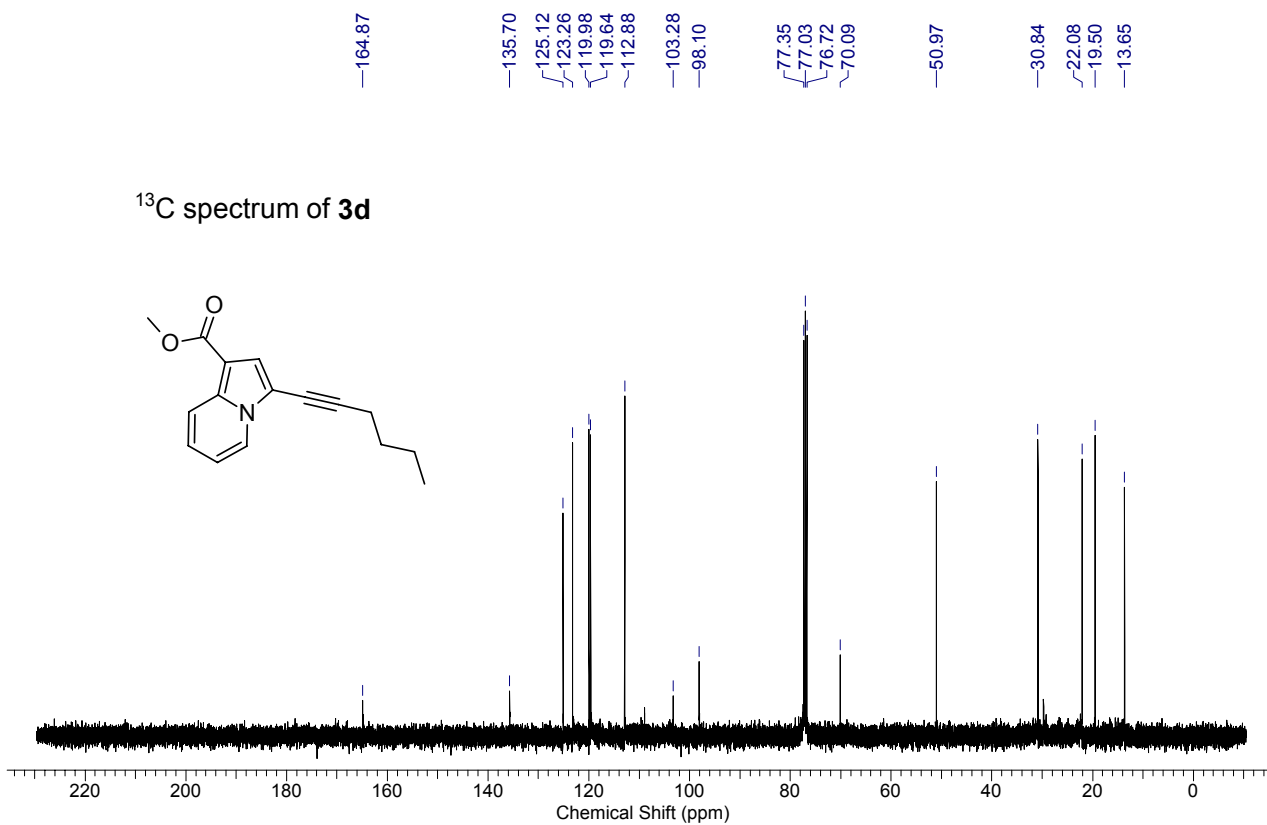

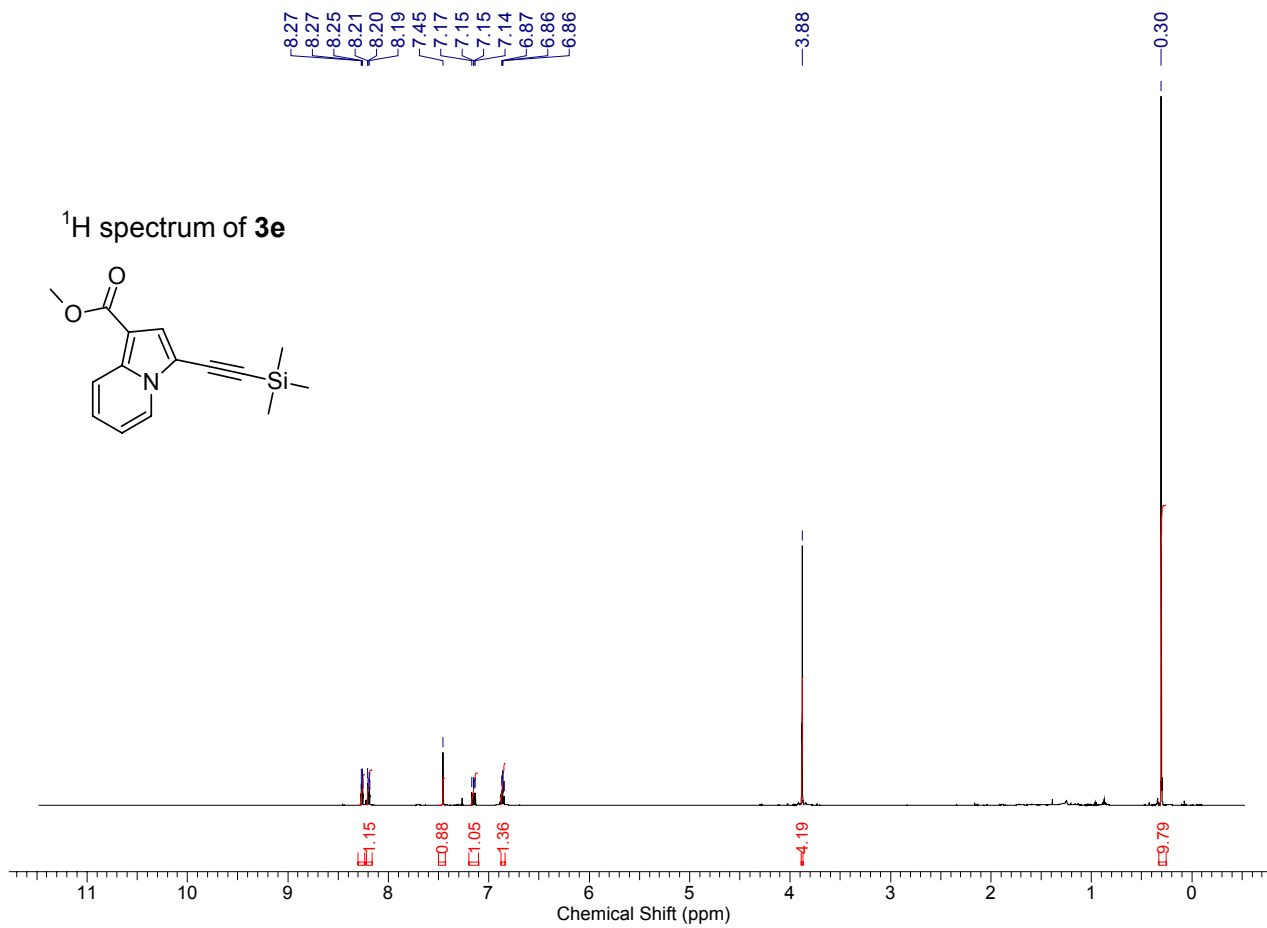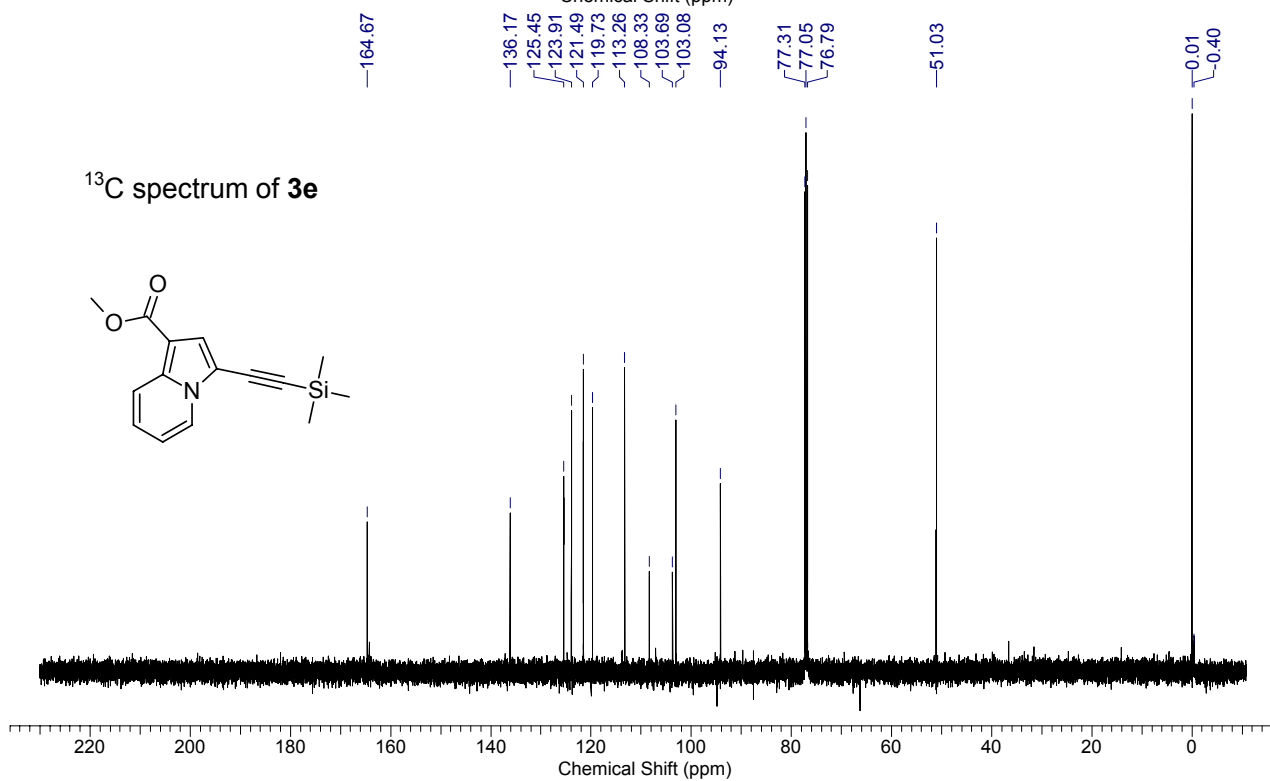

<sup>1</sup>H spectrum of **3f**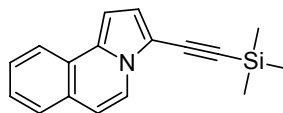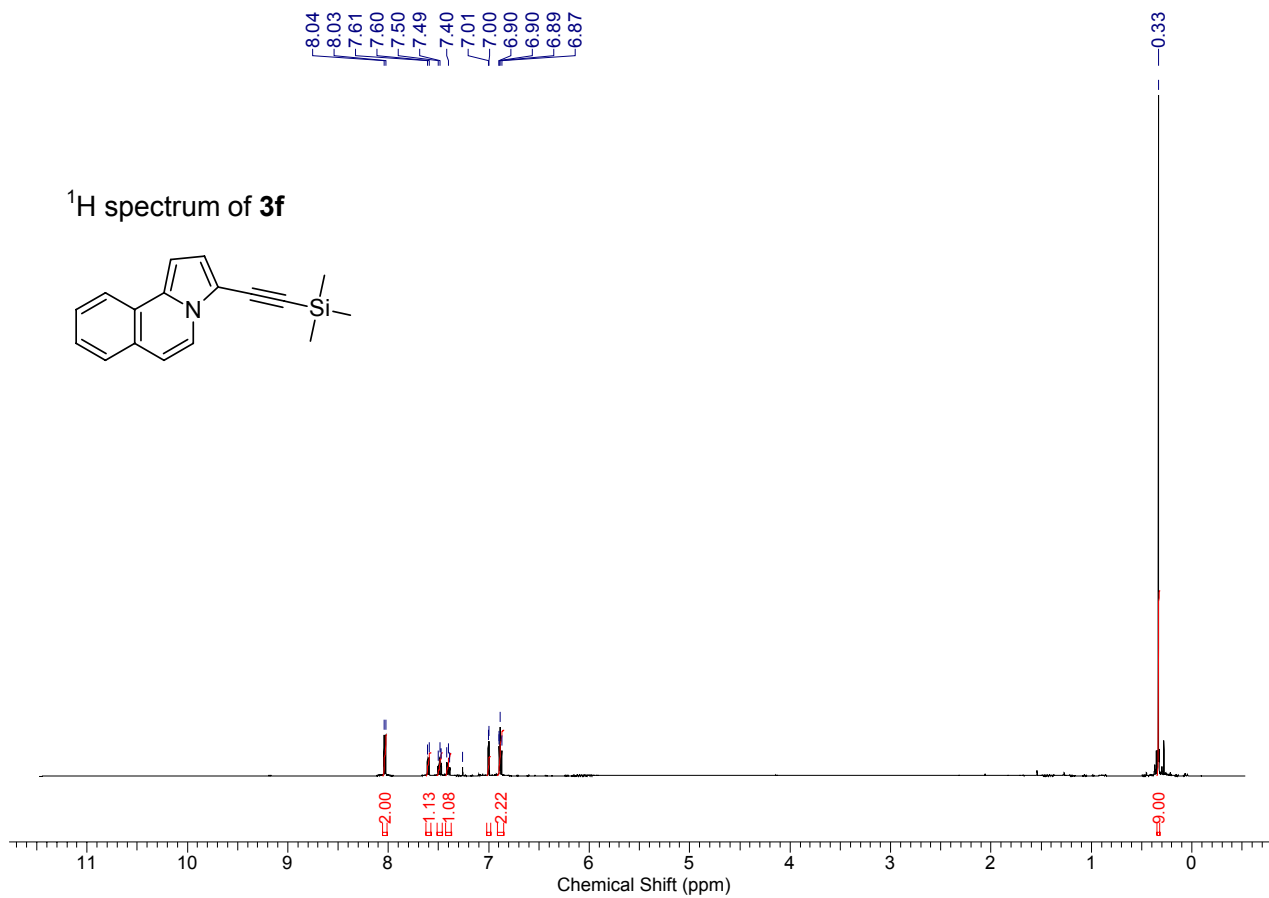<sup>13</sup>C spectrum of **3f**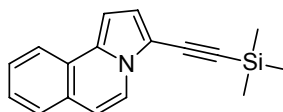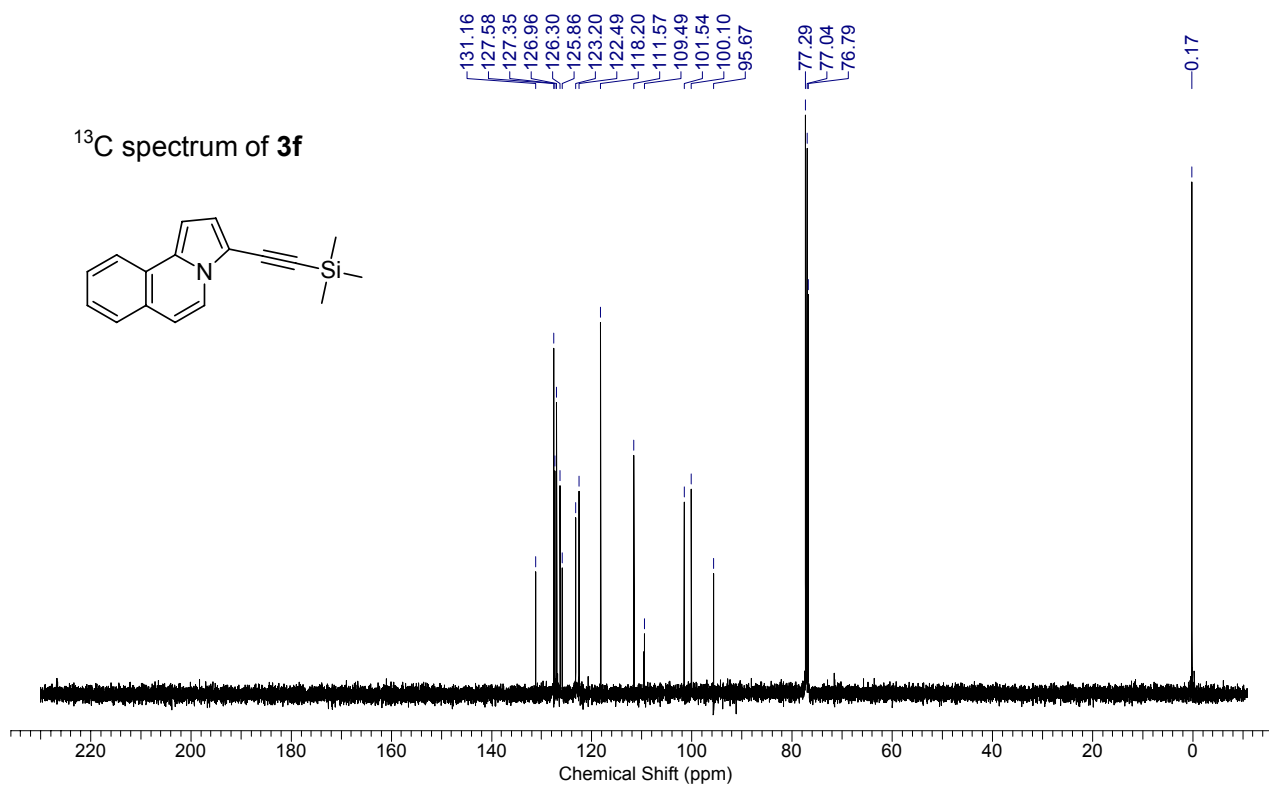

8.15  
8.14  
7.61  
7.60  
7.59  
7.59  
7.40  
7.38  
7.37  
7.07  
7.06  
6.97

$^1\text{H}$  spectrum of **3g**

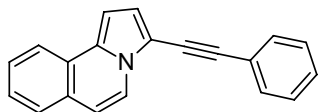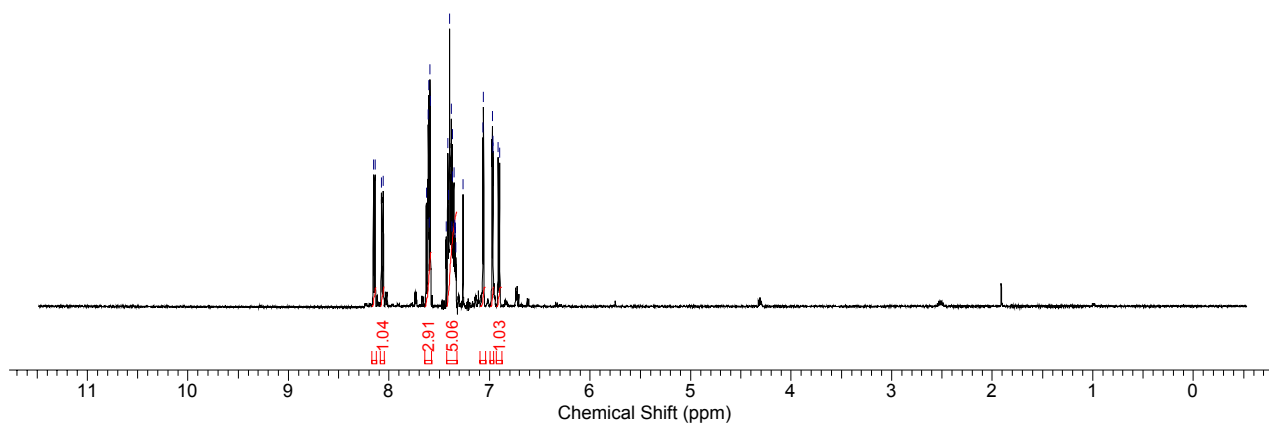

132.48  
131.09  
128.41  
128.05  
127.59  
127.29  
126.95  
126.25  
123.11  
122.40  
117.77  
111.57  
100.46  
95.96  
80.37  
77.25  
77.00  
76.74

$^{13}\text{C}$  spectrum of **3g**

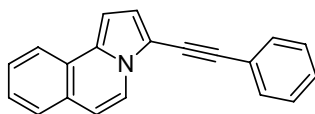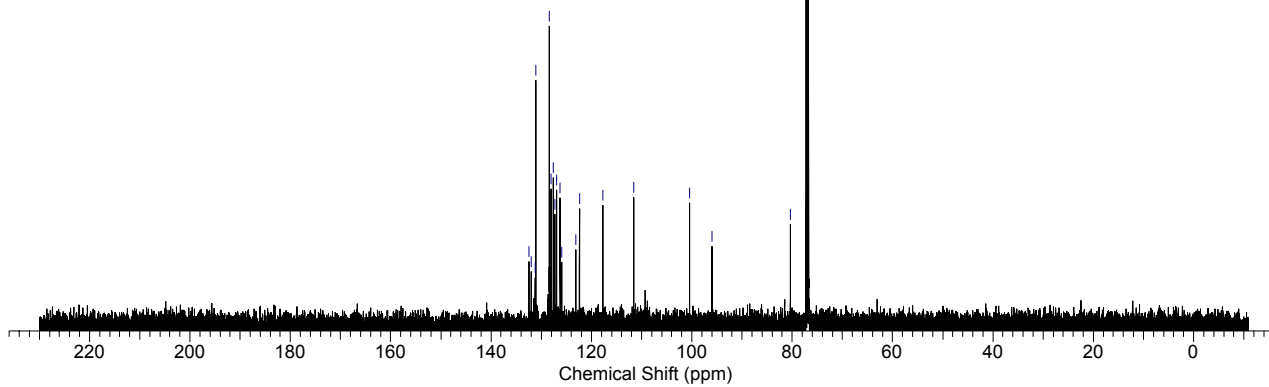



8.03  
8.02  
7.59  
7.57  
7.47  
7.39  
7.37  
6.89  
6.84  
6.83

2.60  
2.58  
2.57  
1.70  
1.68  
1.67  
1.58  
1.56  
1.55  
1.53  
1.02  
1.00  
0.99

$^1\text{H}$  spectrum of **3h**

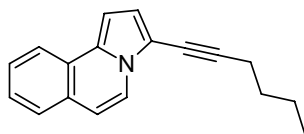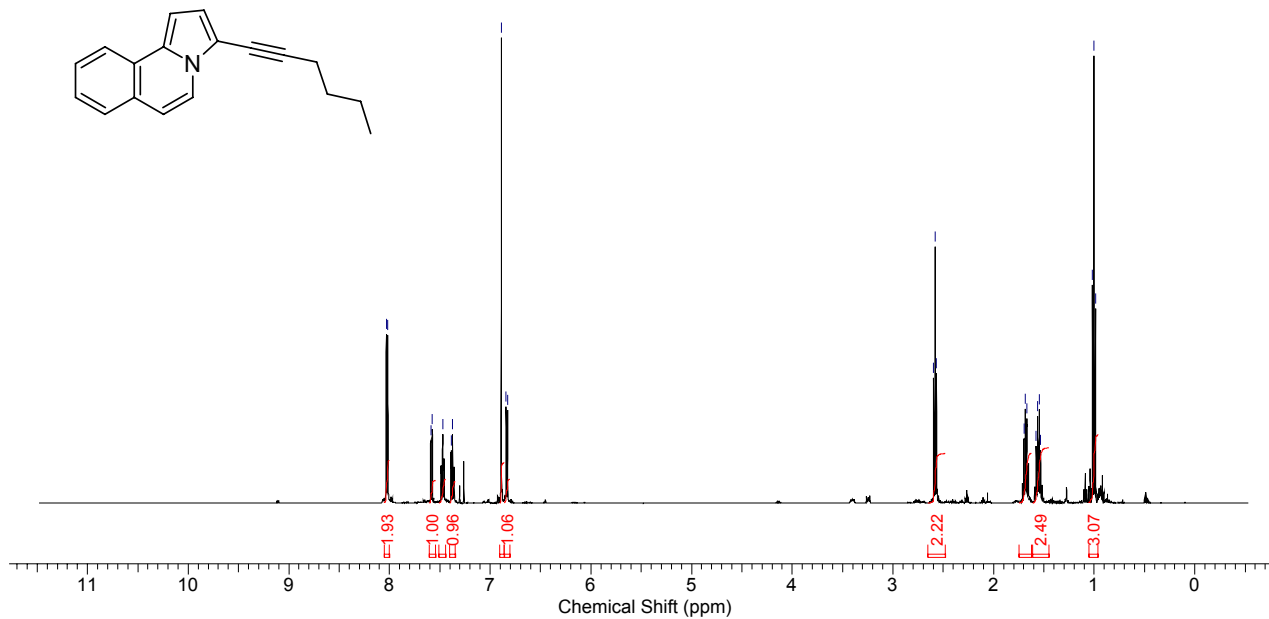

$^{13}\text{C}$  spectrum of **3h**

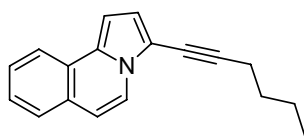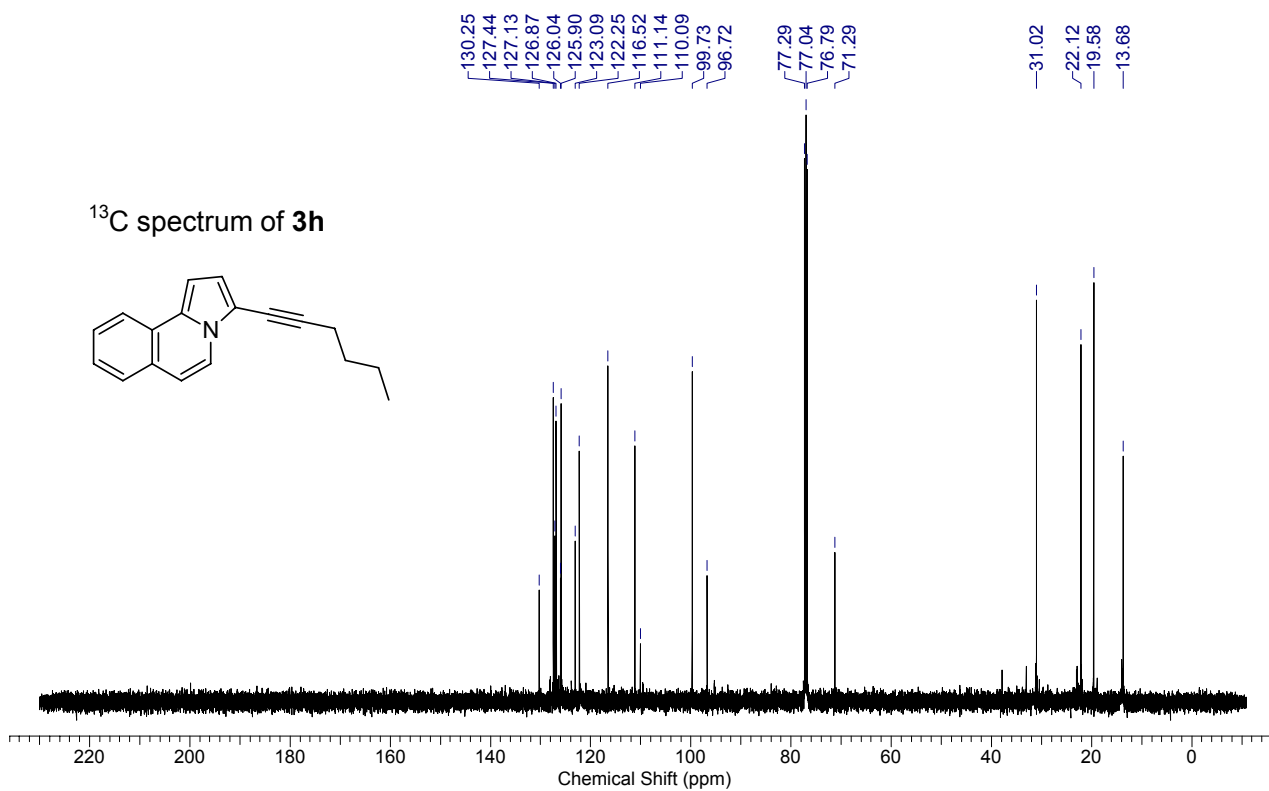

8.04  
8.02  
7.60  
7.58  
7.48  
7.40  
7.38  
7.36  
6.94  
6.93  
6.92  
6.85  
6.83  
6.28  
6.27

2.32  
2.32  
2.21  
2.20  
2.19  
2.19  
1.74  
1.67  
1.66  
1.65

<sup>1</sup>H spectrum of **3i**

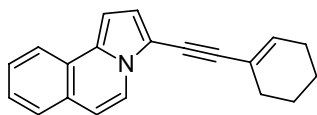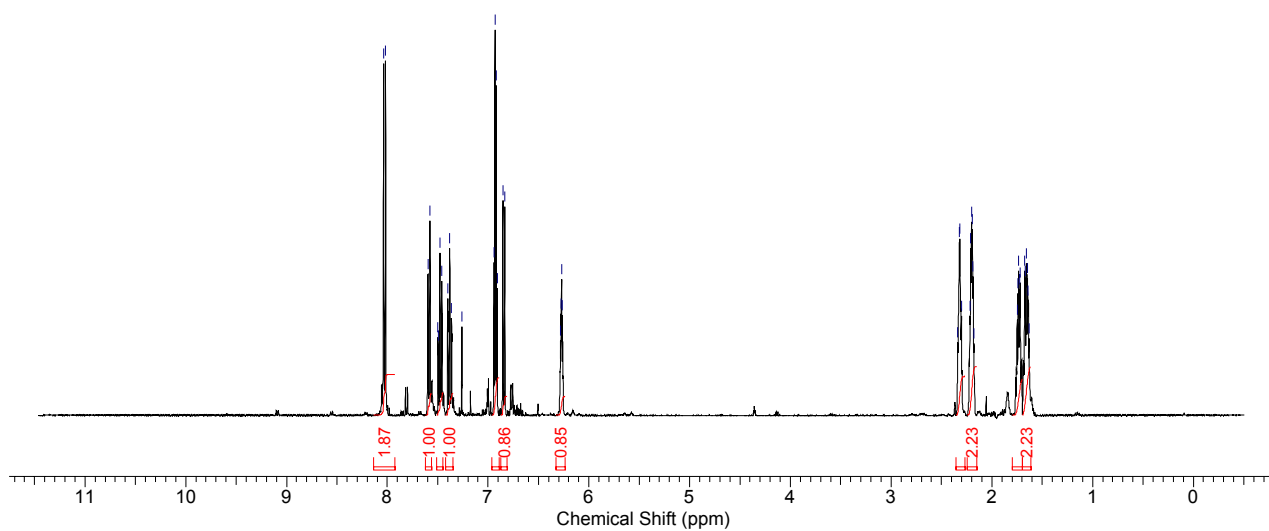

136.51  
134.64  
127.51  
127.24  
126.91  
126.07  
123.15  
122.33  
122.12  
120.66  
117.11  
111.31  
110.32  
100.22  
97.66  
77.51  
77.37  
77.05  
76.73

29.35  
25.85  
22.40  
21.58

<sup>13</sup>C spectrum of **3i**

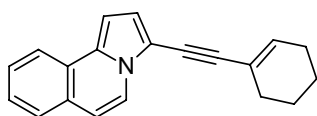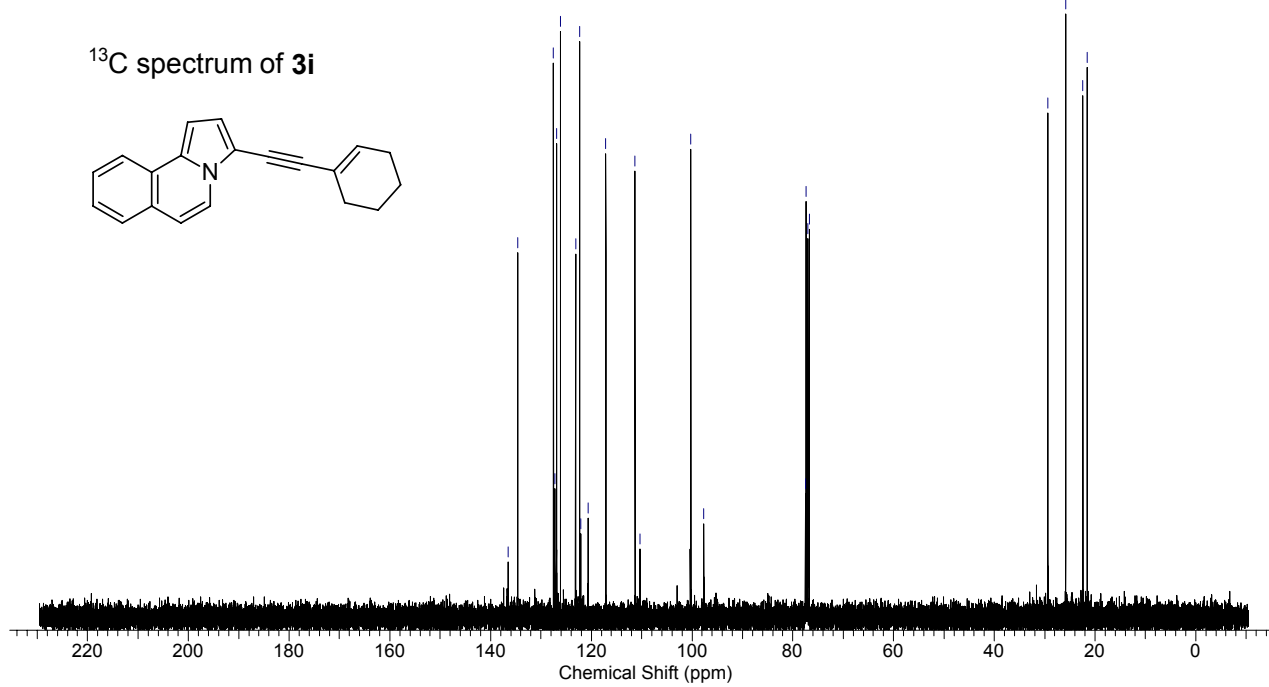

<sup>1</sup>H spectrum of **3j**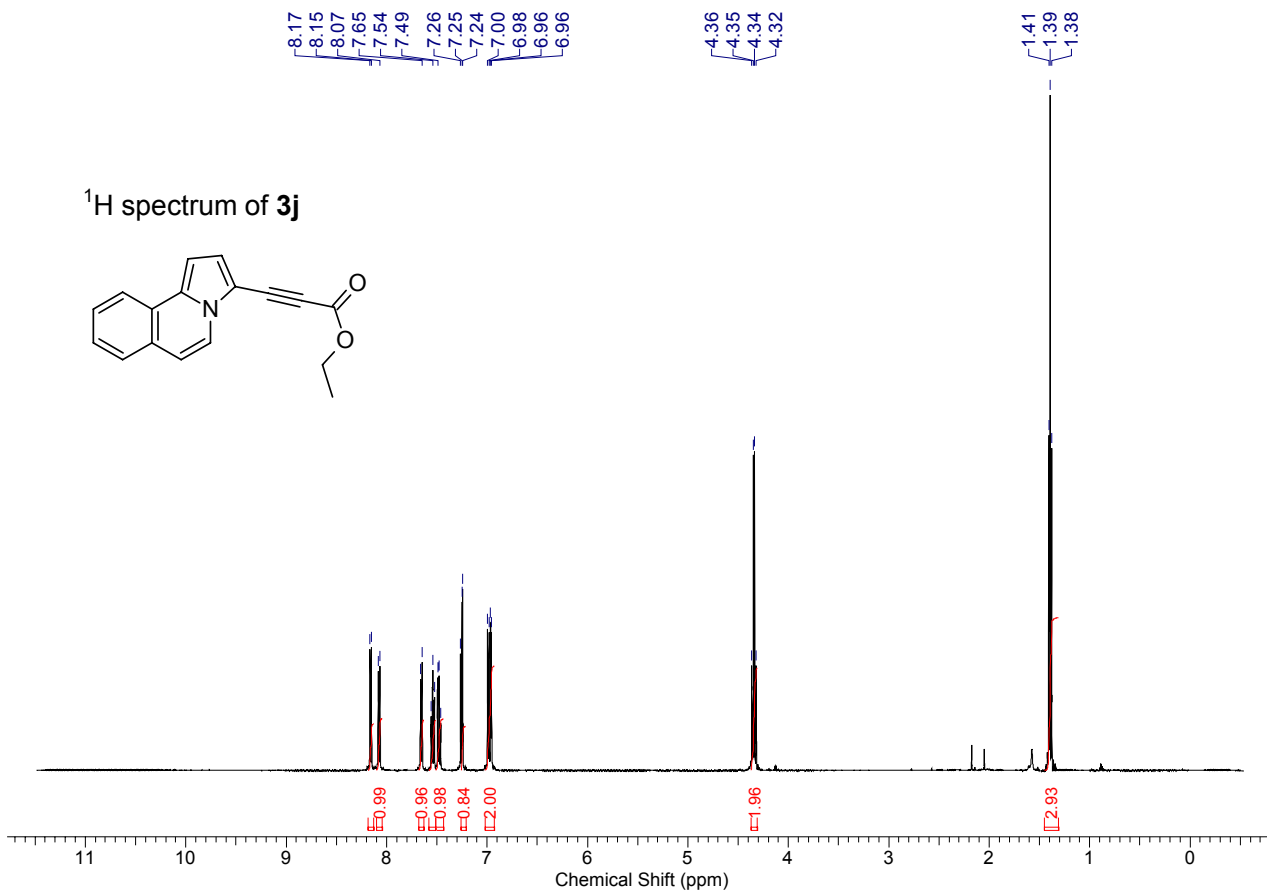<sup>13</sup>C spectrum of **3j**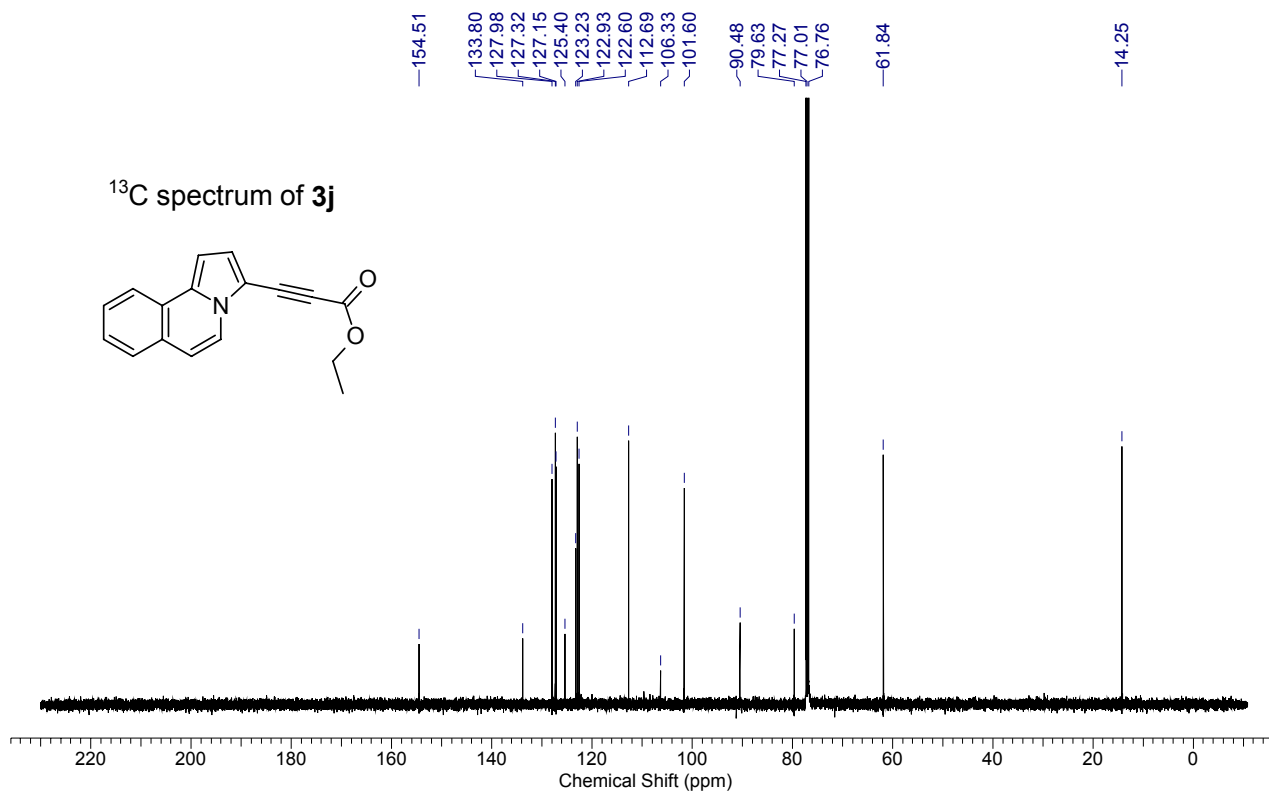

7.71  
7.70  
7.68  
7.66  
7.54  
7.53  
7.43  
7.32  
7.18  
7.18  
6.83  
6.83

4.35  
4.33  
4.32  
4.30

1.36  
1.35  
1.33

<sup>1</sup>H spectrum of **3k**

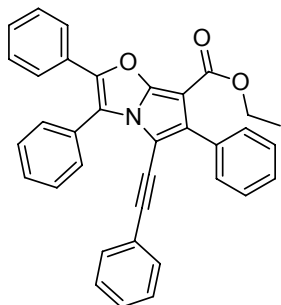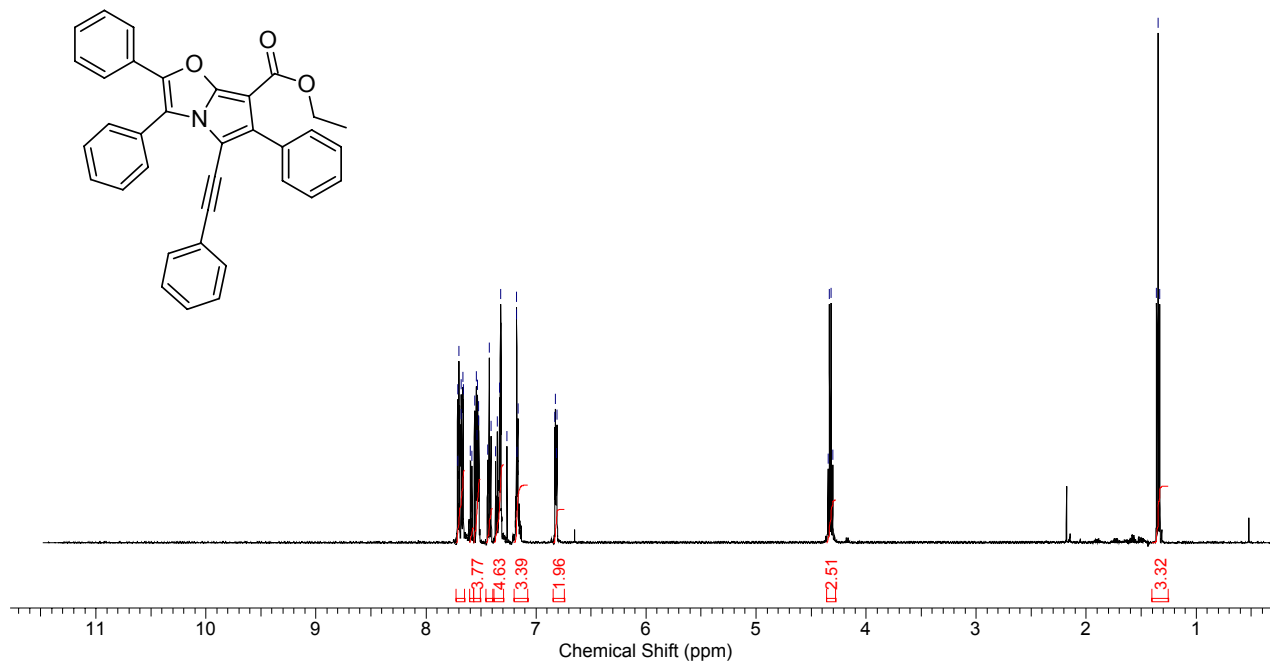

162.67  
149.48  
146.06  
135.41  
131.23  
130.66  
130.47  
128.97  
128.69  
127.94  
127.75  
127.29  
125.57  
121.09

95.61

80.00  
77.30  
77.04  
76.79

59.68

14.48

<sup>13</sup>C spectrum of **3k**

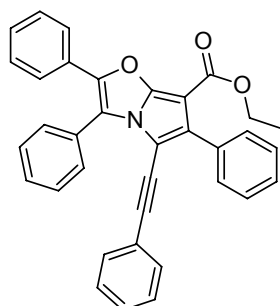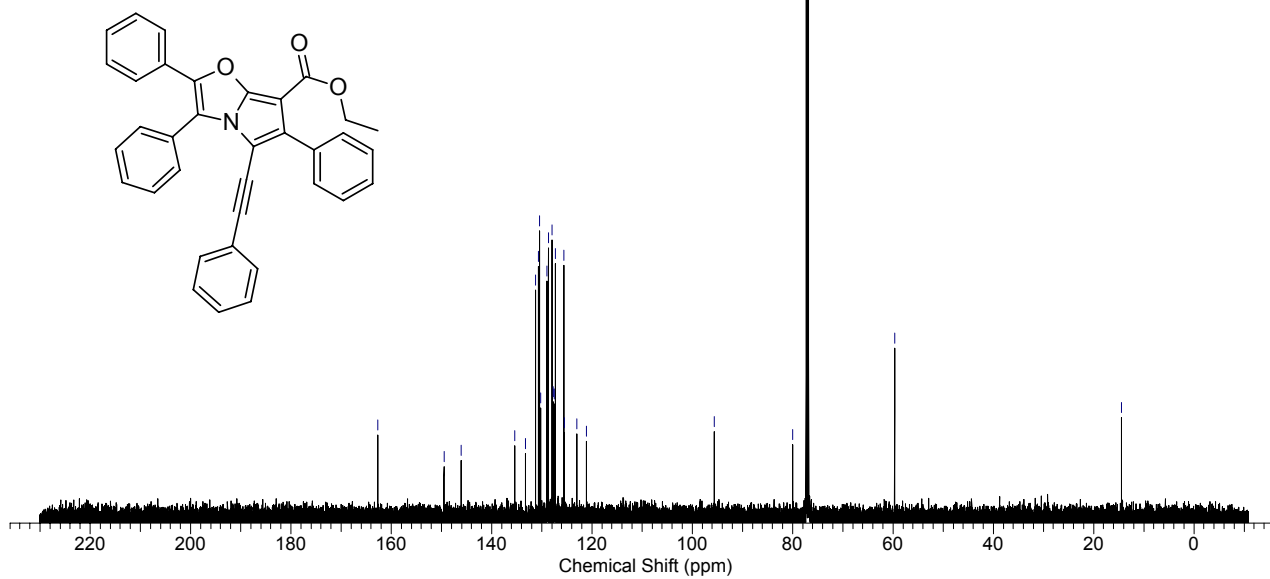

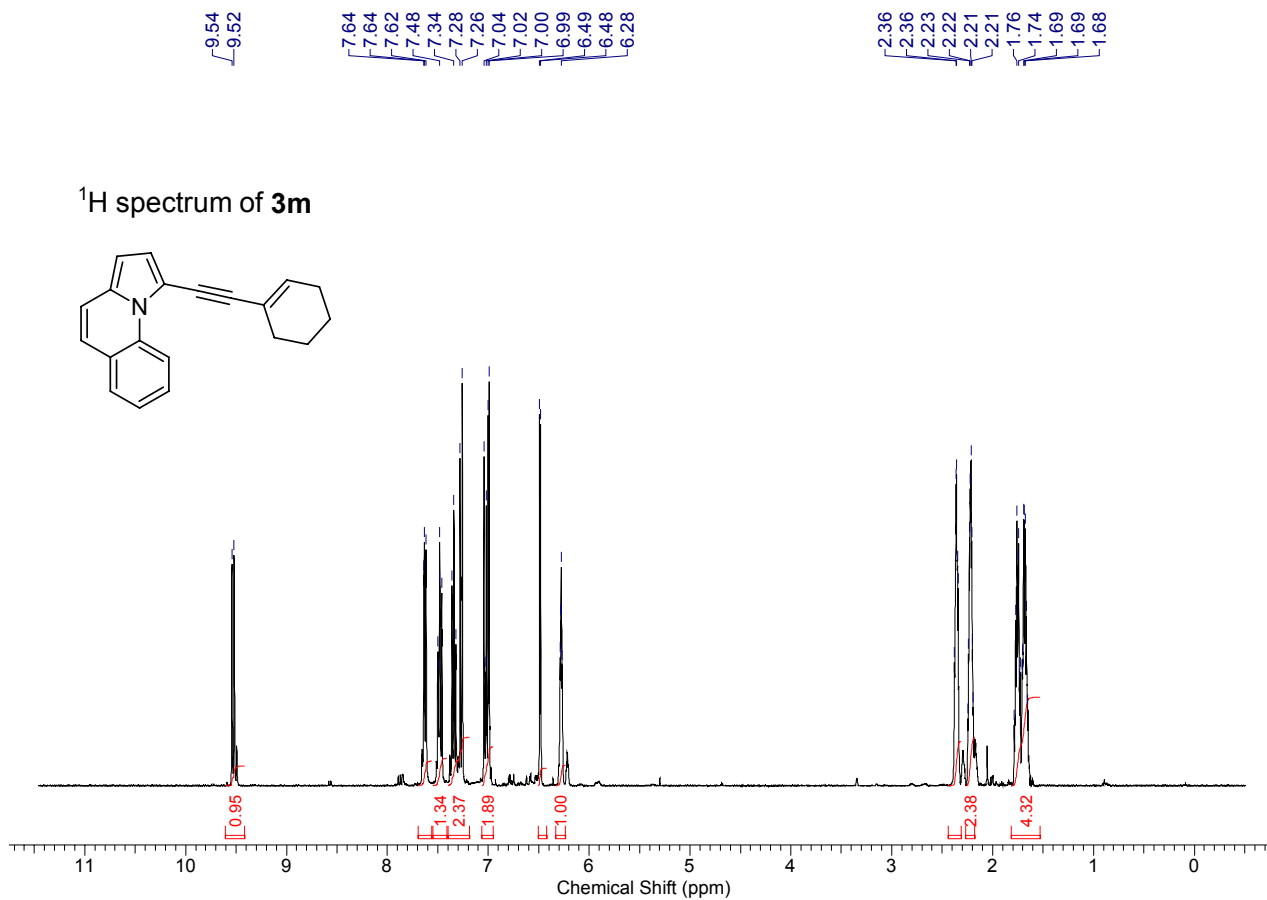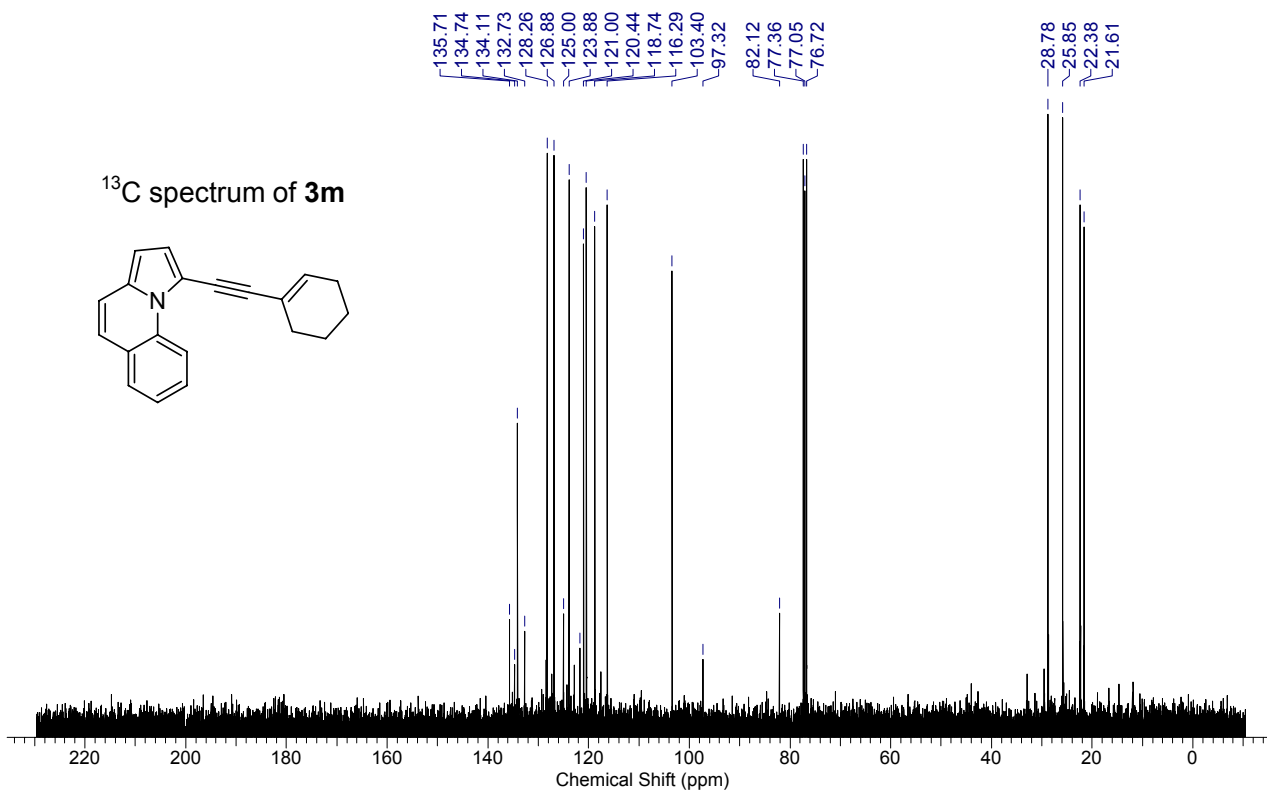

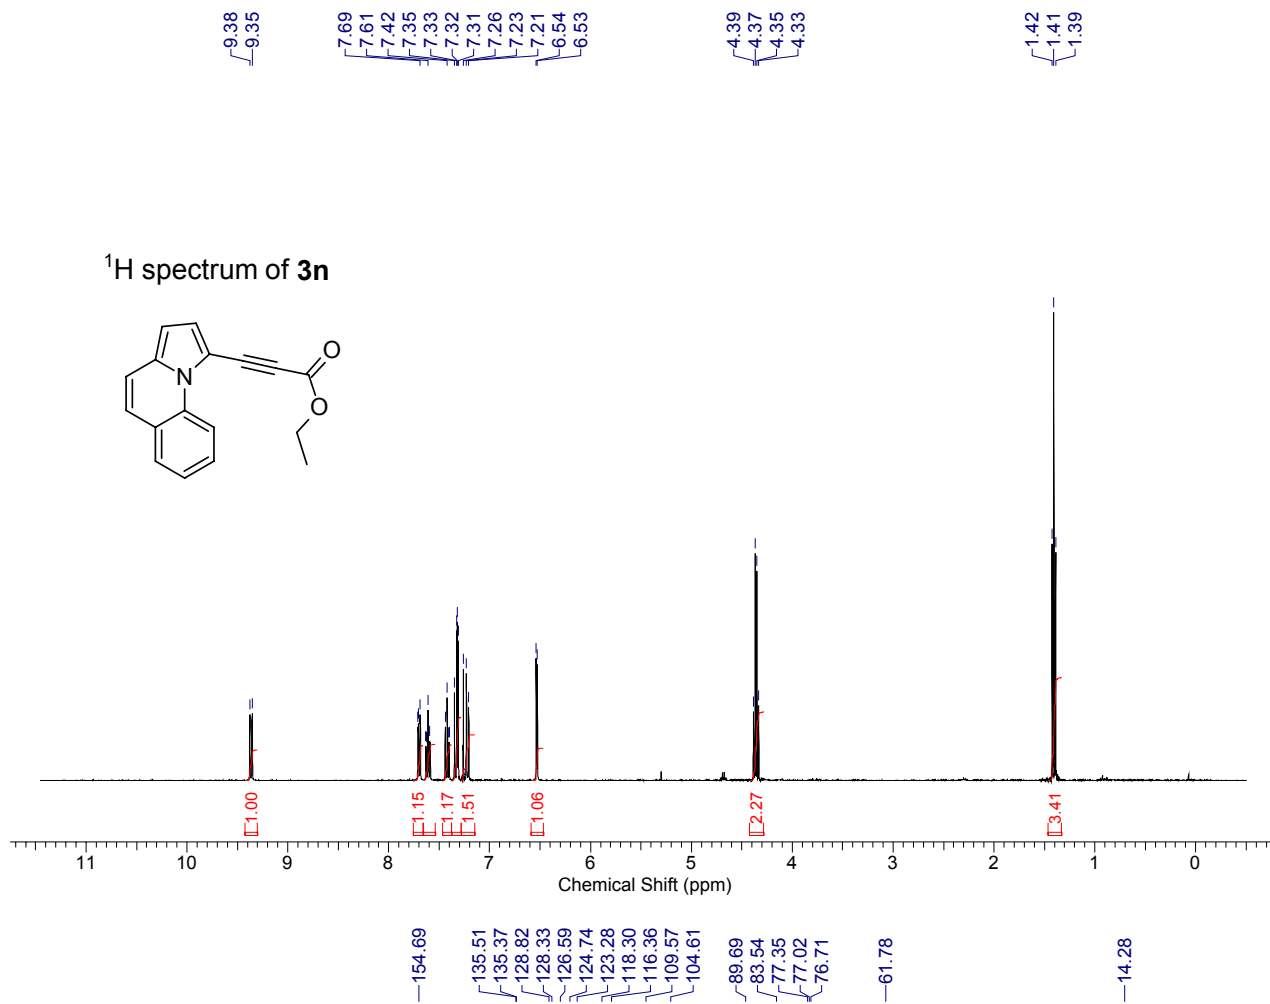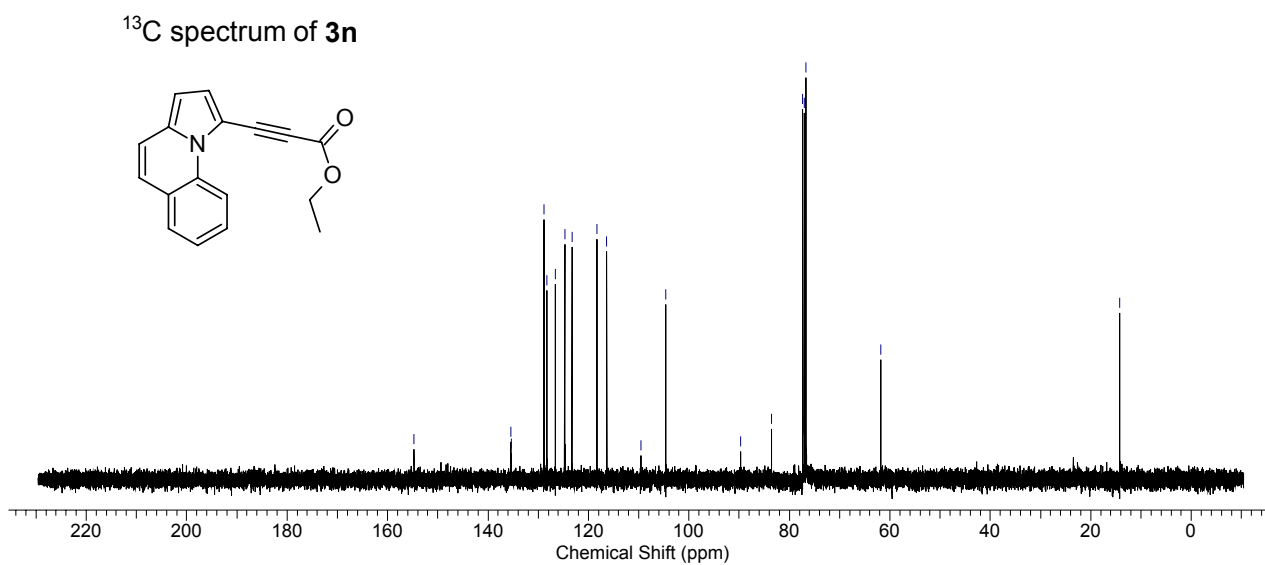

<sup>1</sup>H spectrum of **3o**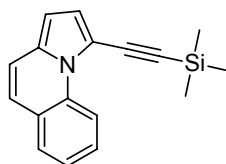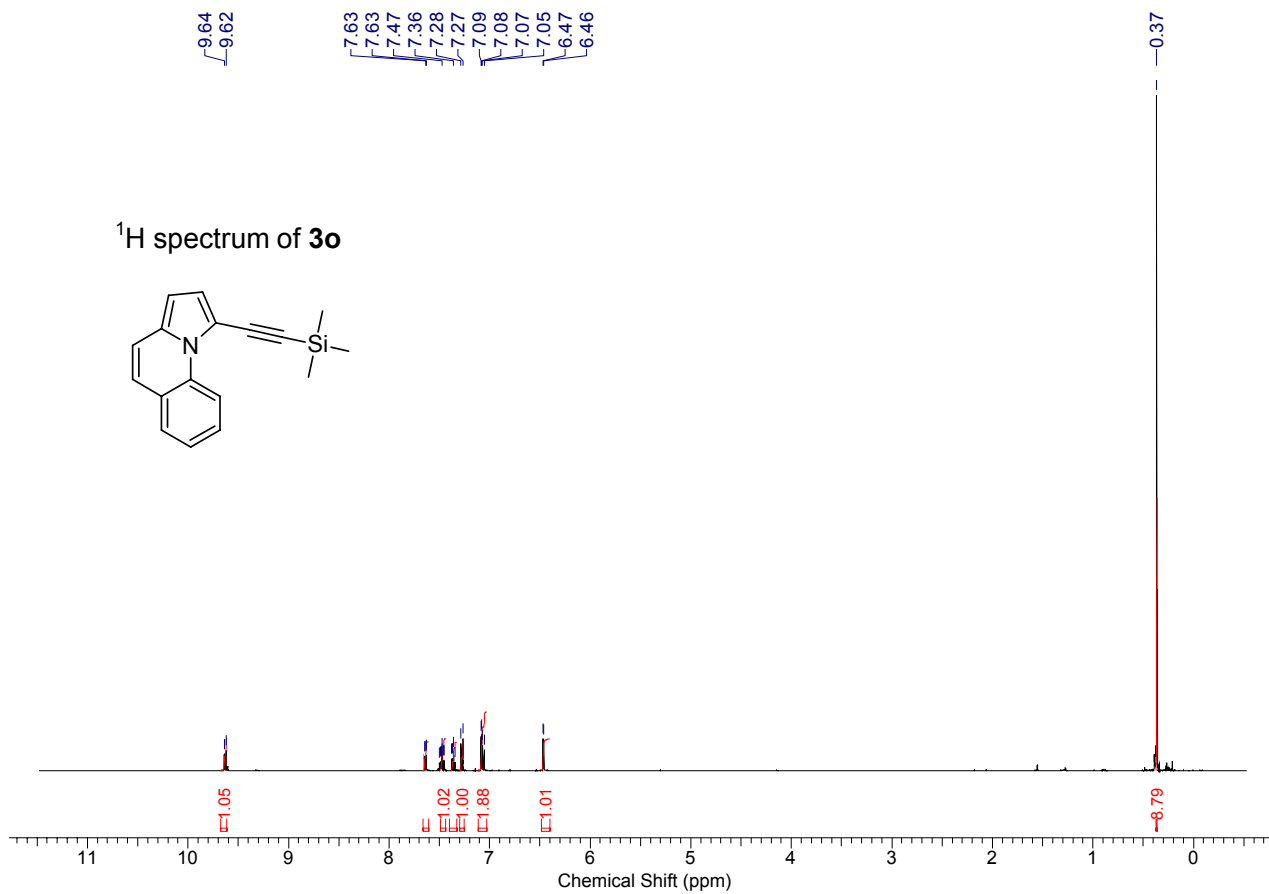<sup>13</sup>C spectrum of **3o**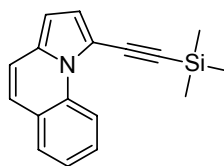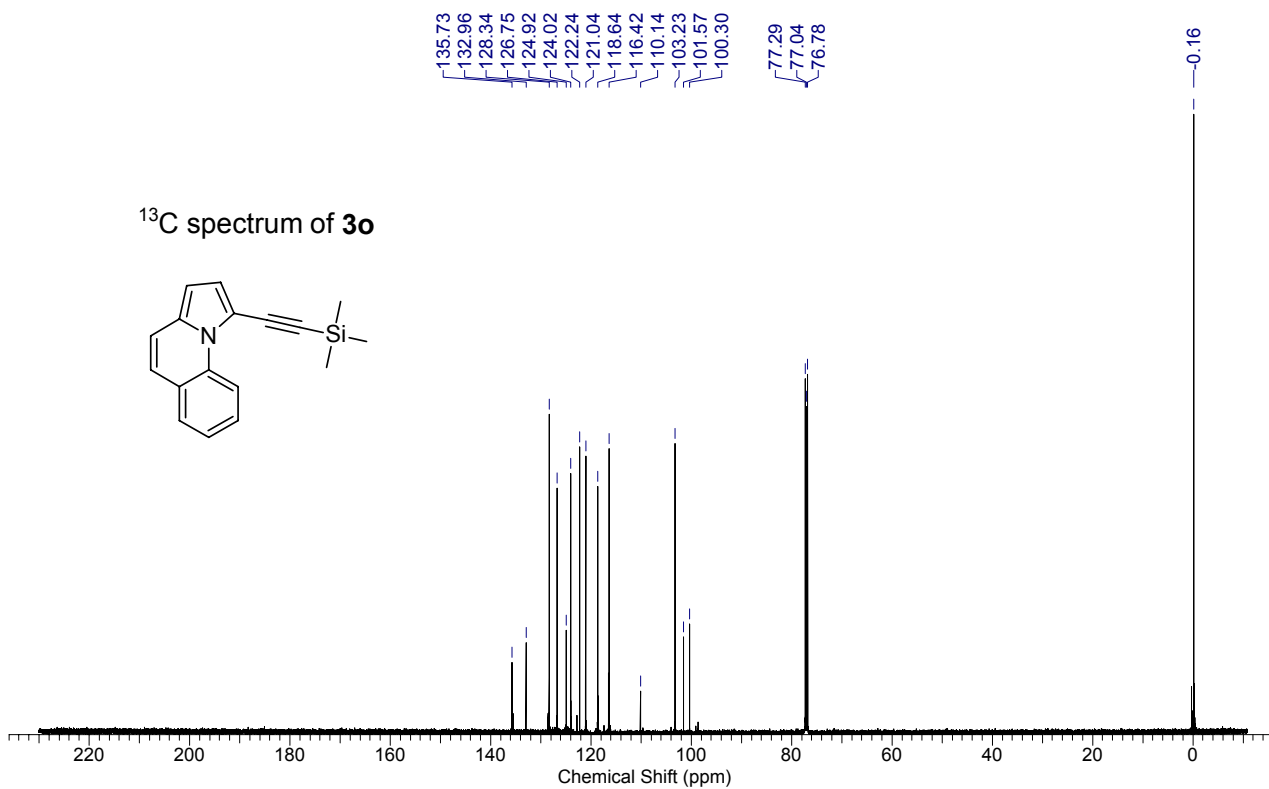

8.44  
8.43  
7.61  
7.60  
7.44  
7.42  
7.41  
7.41  
7.37  
7.09  
7.08  
6.91  
6.89  
6.87  
6.79  
6.50  
6.49

<sup>1</sup>H spectrum of **3a**

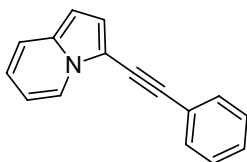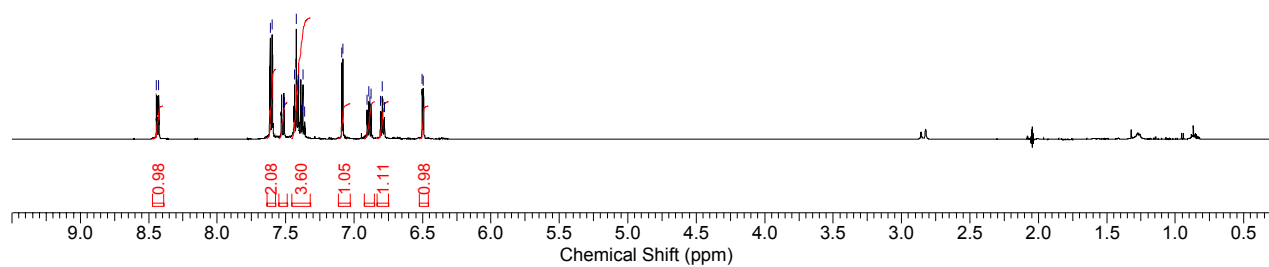

134.24  
131.00  
130.99  
128.42  
127.89  
124.67  
123.49  
119.15  
118.80  
111.31  
106.78  
99.94  
96.78  
80.56  
77.29  
77.03  
76.78

<sup>13</sup>C spectrum of **3a**

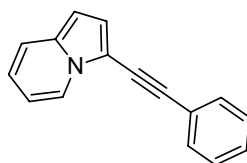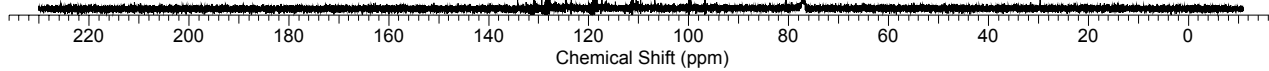



<sup>1</sup>H spectrum of **3I**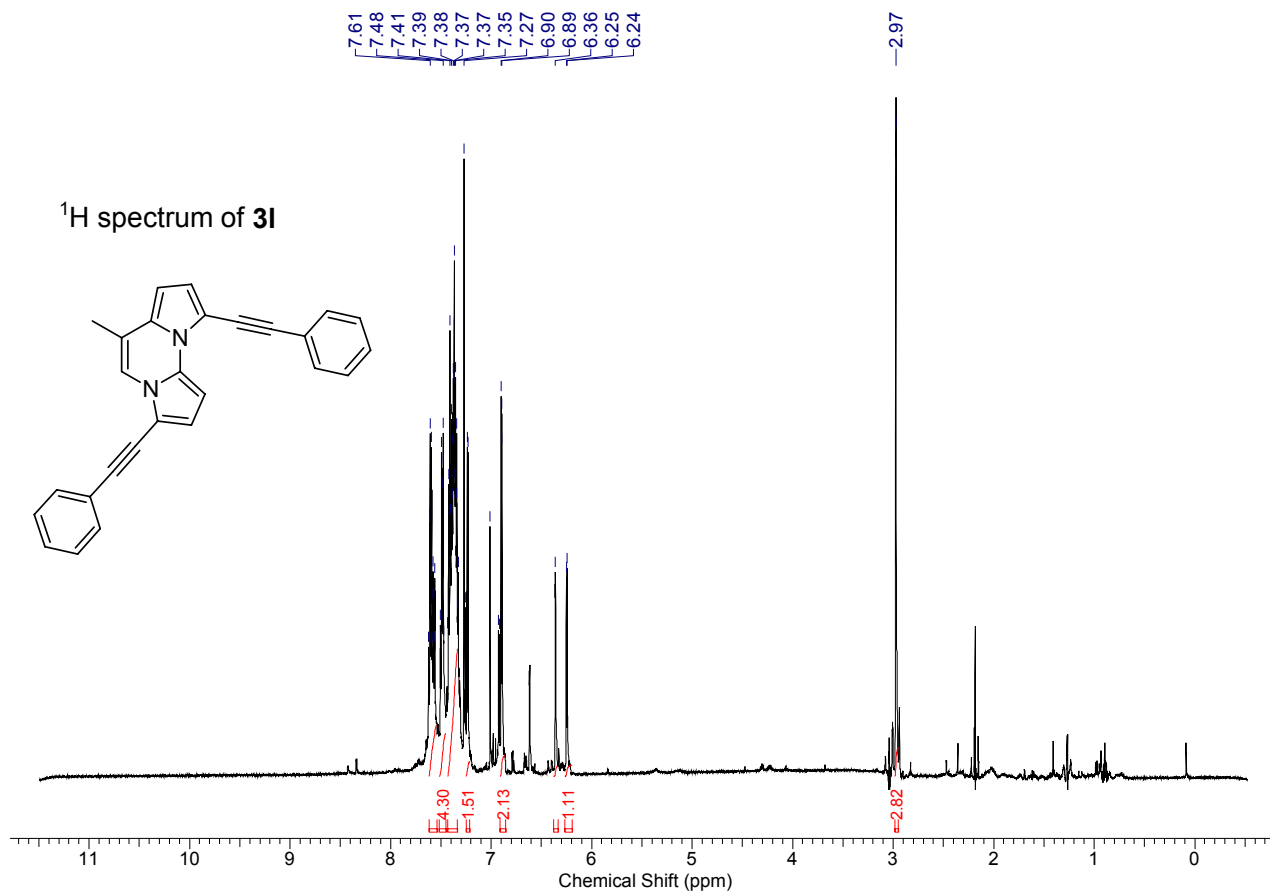<sup>13</sup>C spectrum of **3I**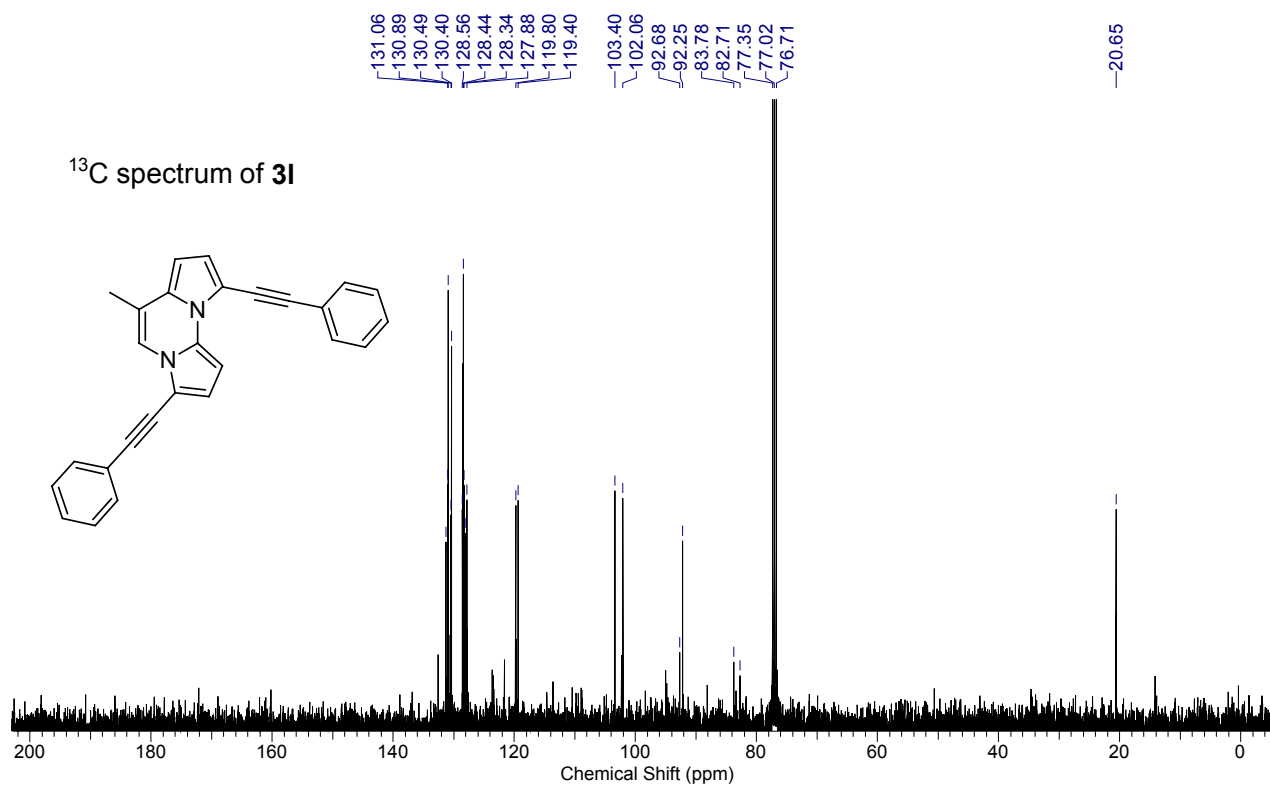

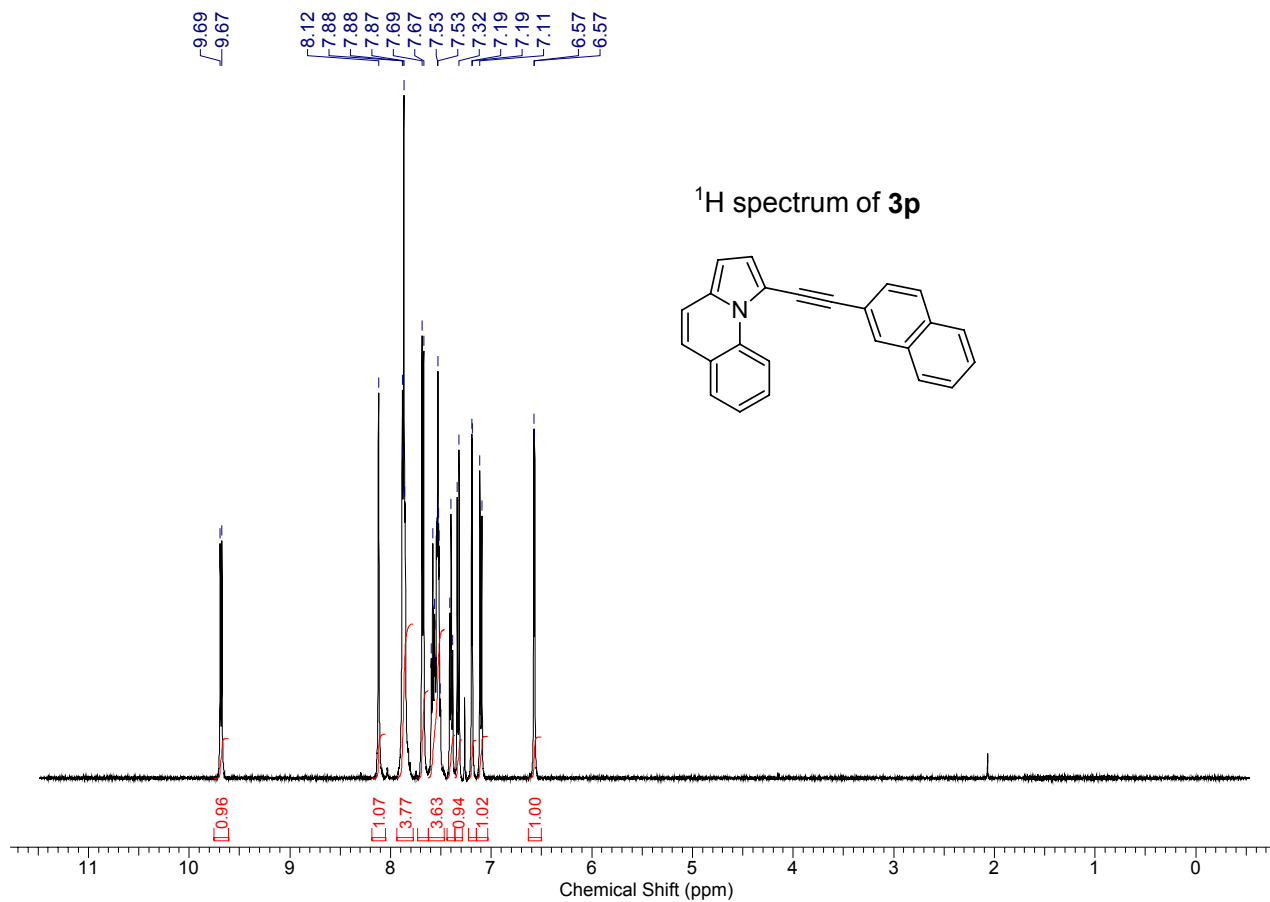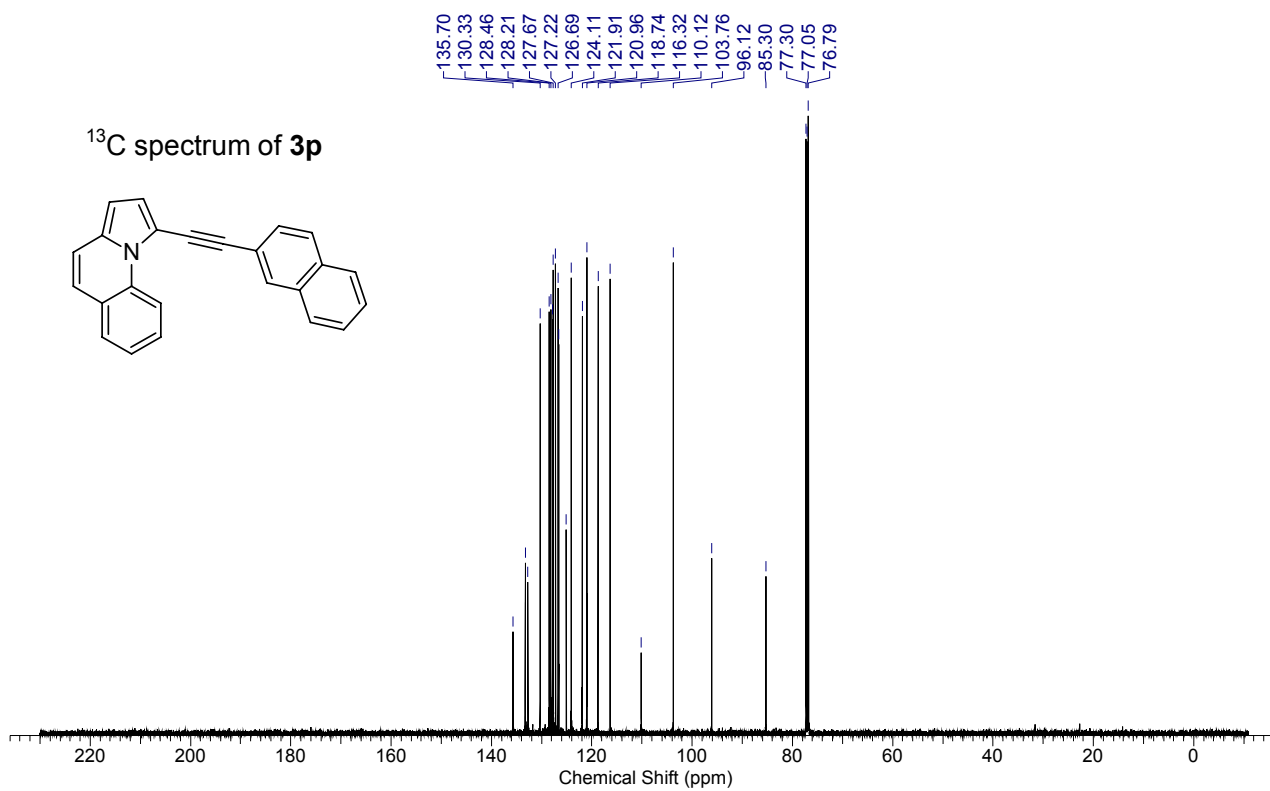

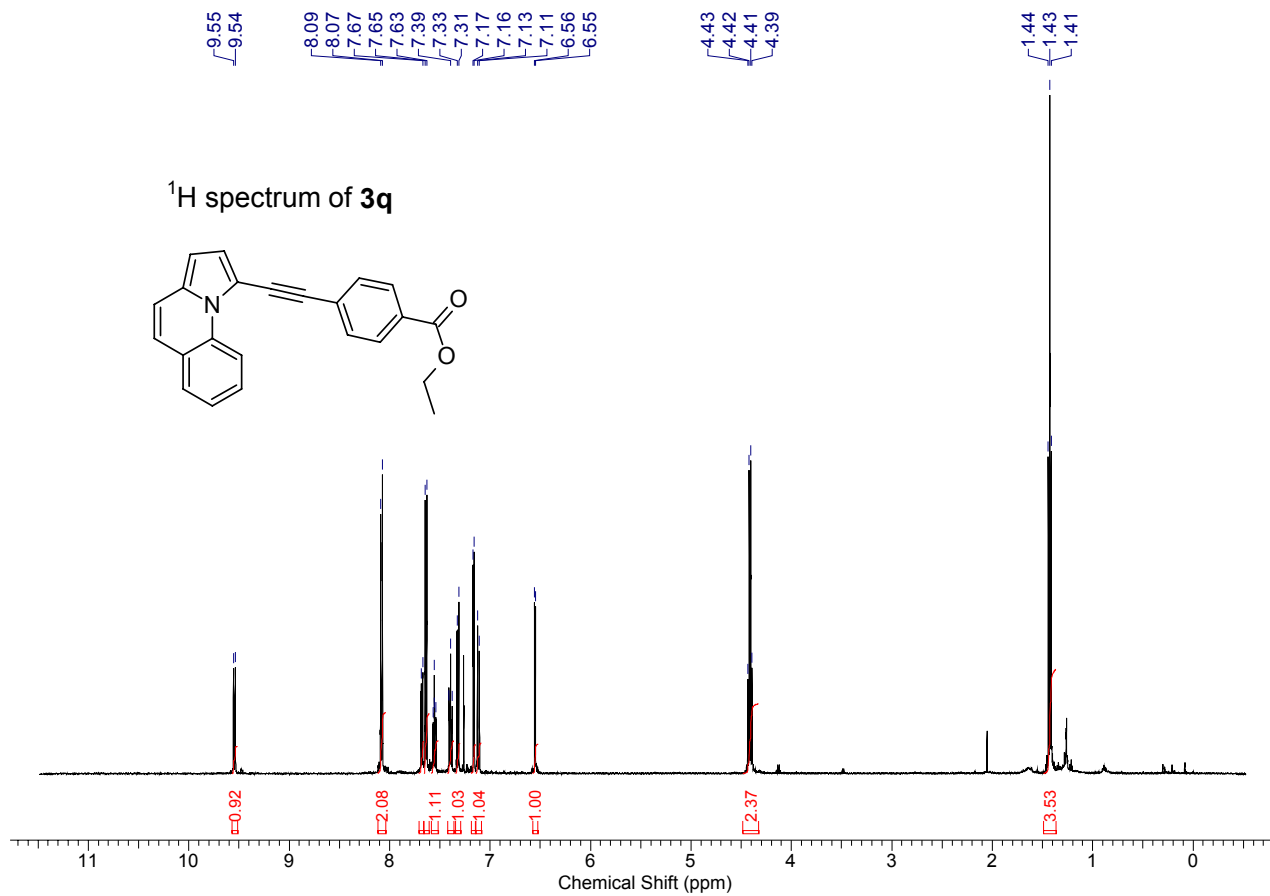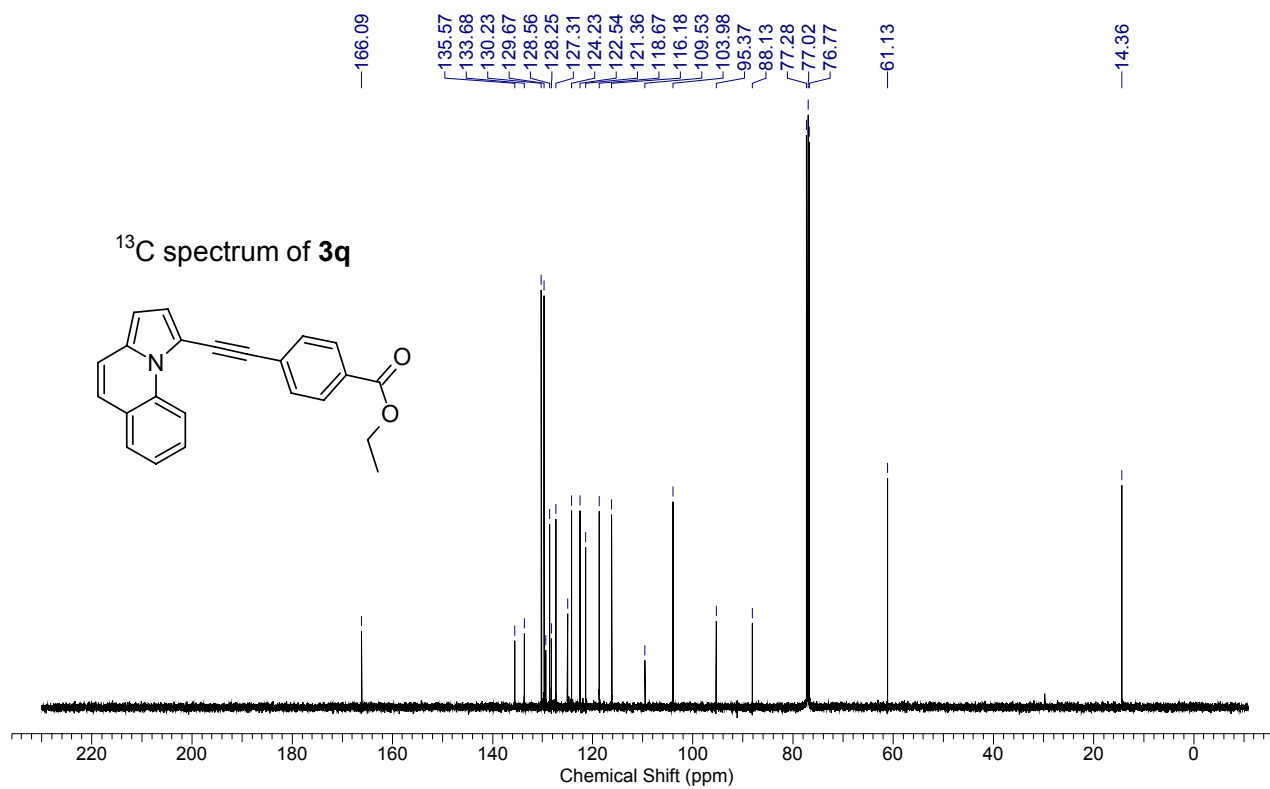

is702a.003.001.2rr.esp

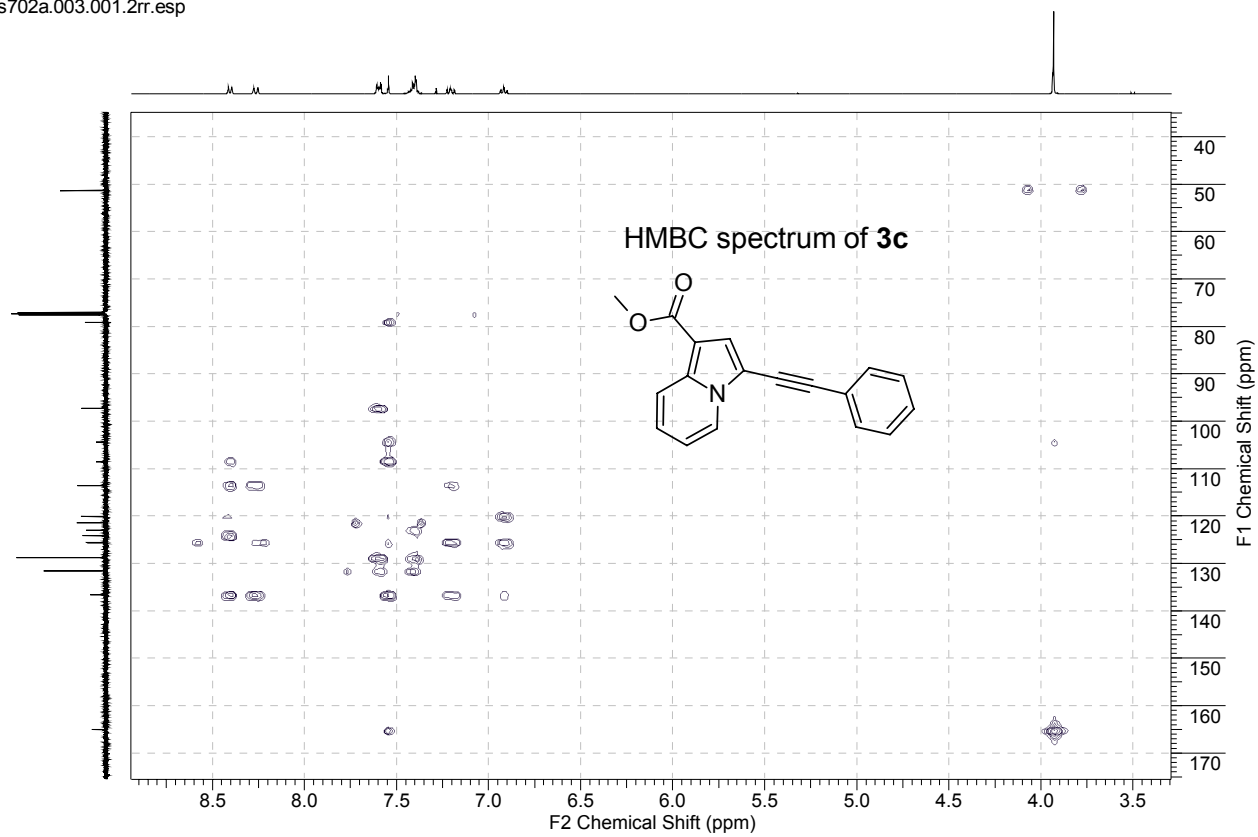

is702a.004.001.2rr.esp

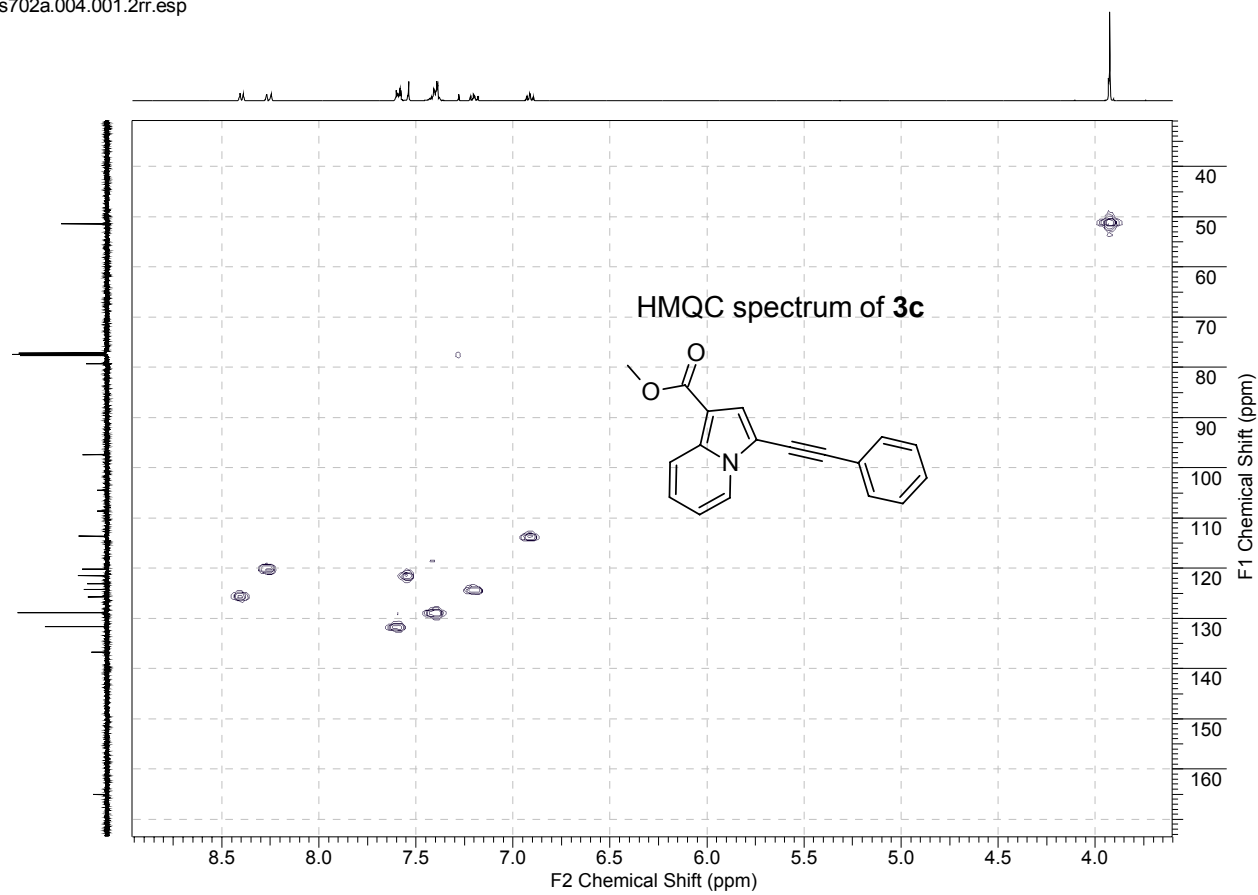

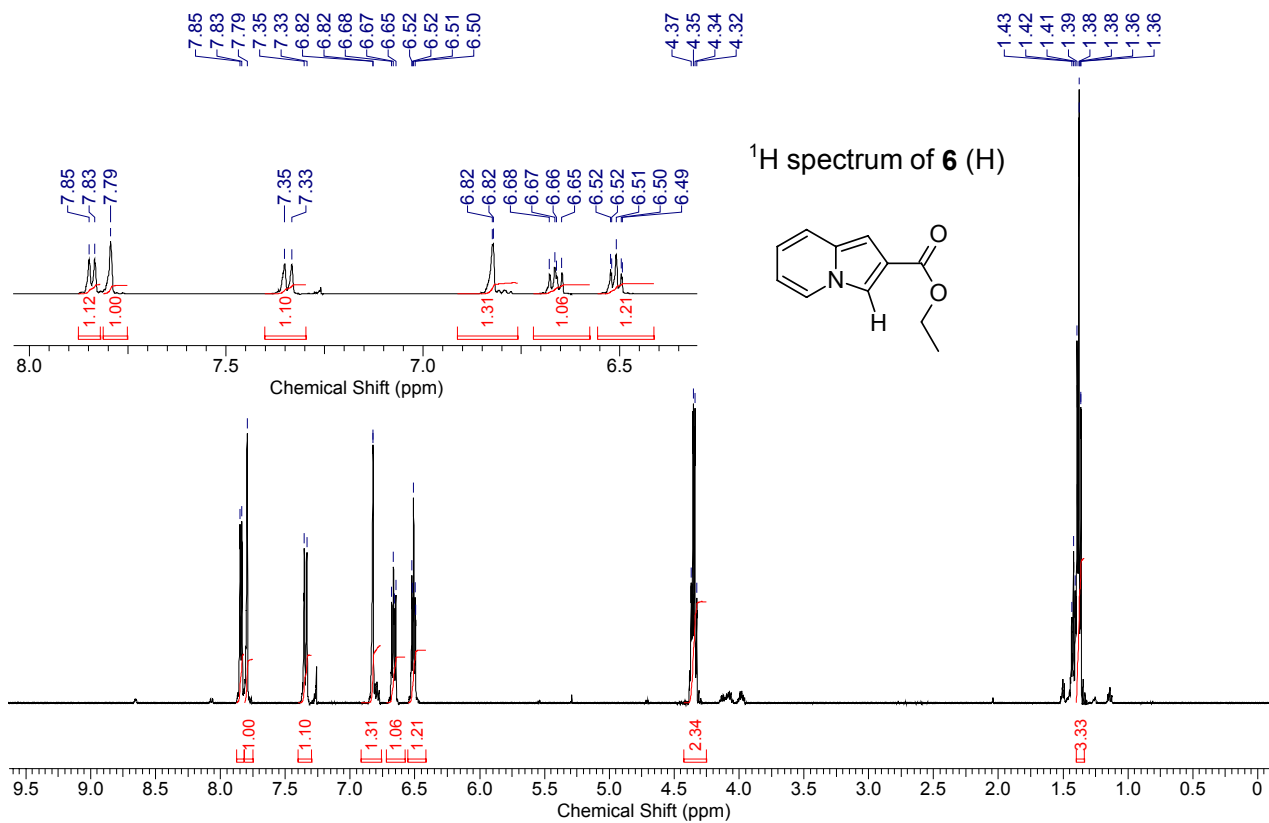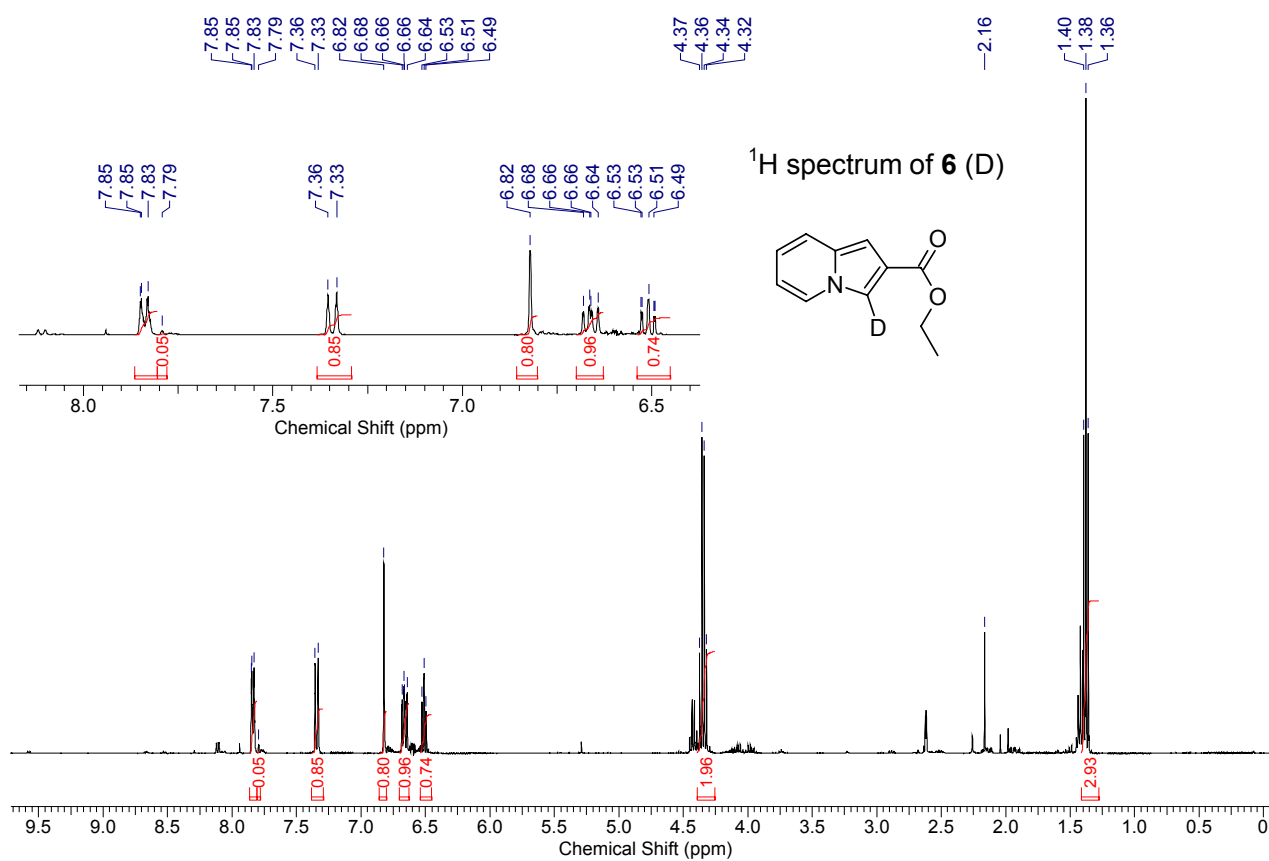

Supplement: NIHMS382575-supplement-Supporting_Information.pdf [file NIHMS382575-supplement-Supporting_Information.pdf]
